# Supplementary material for: Preparing for Winter: The Transcriptomic Response Associated with Different Day Lengths in Drosophila montana
Source: G3 (Bethesda). 2016 Mar 11;6(5):1373–81. doi: 10.1534/g3.116.027870 (PMC4856088; doi:10.1534/g3.116.027870)
Supplement: Supplemental Material [file supp_g3.116.027870_TableS1.xlsx]

## Sheet: ALL_DIA_GOTERMS
Table S1 | GO terms associated with genes DE in response to a shorter day length in diapausing females.
Level	GO ID	Term	#Seqs
2	GO:0009987	cellular process	53
2	GO:0044699	single-organism process	50
2	GO:0032502	developmental process	35
2	GO:0032501	multicellular organismal process	34
2	GO:0008152	metabolic process	33
2	GO:0071840	cellular component organization or biogenesis	28
2	GO:0065007	biological regulation	24
2	GO:0050896	response to stimulus	23
2	GO:0051179	localization	17
2	GO:0000003	reproduction	15
2	GO:0023052	signaling	15
2	GO:0040011	locomotion	11
2	GO:0040007	growth	5
2	GO:0051704	multi-organism process	5
2	GO:0002376	immune system process	3
3	GO:0044763	single-organism cellular process	42
3	GO:0071704	organic substance metabolic process	33
3	GO:0048856	anatomical structure development	32
3	GO:0044238	primary metabolic process	31
3	GO:0044707	single-multicellular organism process	30
3	GO:0044767	single-organism developmental process	29
3	GO:0016043	cellular component organization	28
3	GO:0044237	cellular metabolic process	26
3	GO:0050789	regulation of biological process	23
3	GO:0006807	nitrogen compound metabolic process	16
3	GO:0022414	reproductive process	15
3	GO:0044700	single organism signaling	15
3	GO:0032504	multicellular organism reproduction	14
3	GO:0009058	biosynthetic process	14
3	GO:0019953	sexual reproduction	11
3	GO:0051234	establishment of localization	11
3	GO:0042221	response to chemical stimulus	11
3	GO:0009605	response to external stimulus	11
3	GO:0048610	cellular process involved in reproduction	9
3	GO:0044710	single-organism metabolic process	9
3	GO:0065008	regulation of biological quality	8
3	GO:0044085	cellular component biogenesis	7
3	GO:0007610	behavior	6
3	GO:0006950	response to stress	6
3	GO:0033036	macromolecule localization	6
3	GO:0051674	localization of cell	6
3	GO:0009628	response to abiotic stimulus	4
3	GO:0009056	catabolic process	4
3	GO:0016265	death	4
3	GO:0044706	multi-multicellular organism process	3
3	GO:0043473	pigmentation	2
3	GO:0008283	cell proliferation	2
3	GO:0009607	response to biotic stimulus	2
3	GO:0009719	response to endogenous stimulus	2
3	GO:0006955	immune response	1
3	GO:0065009	regulation of molecular function	1
3	GO:0002252	immune effector process	1
3	GO:0002440	production of molecular mediator of immune response	1
4	GO:0007275	multicellular organismal development	28
4	GO:0048869	cellular developmental process	27
4	GO:0009653	anatomical structure morphogenesis	25
4	GO:0043170	macromolecule metabolic process	25
4	GO:0050794	regulation of cellular process	21
4	GO:0007154	cell communication	16
4	GO:0034641	cellular nitrogen compound metabolic process	15
4	GO:0006996	organelle organization	15
4	GO:0019222	regulation of metabolic process	14
4	GO:0006725	cellular aromatic compound metabolic process	14
4	GO:1901576	organic substance biosynthetic process	14
4	GO:0046483	heterocycle metabolic process	14
4	GO:0048609	multicellular organismal reproductive process	14
4	GO:1901360	organic cyclic compound metabolic process	14
4	GO:0044249	cellular biosynthetic process	14
4	GO:0006928	cellular component movement	12
4	GO:0051716	cellular response to stimulus	12
4	GO:0009888	tissue development	12
4	GO:0006810	transport	11
4	GO:0044702	single organism reproductive process	11
4	GO:0030030	cell projection organization	10
4	GO:0048518	positive regulation of biological process	8
4	GO:0003006	developmental process involved in reproduction	8
4	GO:0042330	taxis	8
4	GO:0051641	cellular localization	8
4	GO:0022412	cellular process involved in reproduction in multicellular organism	8
4	GO:0006793	phosphorus metabolic process	7
4	GO:0022607	cellular component assembly	7
4	GO:0048519	negative regulation of biological process	6
4	GO:0061061	muscle structure development	6
4	GO:0043933	macromolecular complex subunit organization	6
4	GO:0090066	regulation of anatomical structure size	5
4	GO:0030029	actin filament-based process	5
4	GO:0003008	system process	5
4	GO:0048589	developmental growth	5
4	GO:0008104	protein localization	5
4	GO:0044281	small molecule metabolic process	5
4	GO:0006629	lipid metabolic process	5
4	GO:0040008	regulation of growth	4
4	GO:0008219	cell death	4
4	GO:0044248	cellular catabolic process	4
4	GO:0050793	regulation of developmental process	4
4	GO:0035637	multicellular organismal signaling	4
4	GO:0050808	synapse organization	4
4	GO:0010033	response to organic substance	4
4	GO:0051239	regulation of multicellular organismal process	4
4	GO:0051128	regulation of cellular component organization	4
4	GO:0048583	regulation of response to stimulus	4
4	GO:0007017	microtubule-based process	3
4	GO:0023051	regulation of signaling	3
4	GO:0044708	single-organism behavior	3
4	GO:0051705	multi-organism behavior	3
4	GO:0007049	cell cycle	3
4	GO:0044703	multi-organism reproductive process	3
4	GO:0070271	protein complex biogenesis	3
4	GO:0019098	reproductive behavior	3
4	GO:1901575	organic substance catabolic process	3
4	GO:0044087	regulation of cellular component biogenesis	3
4	GO:0044711	single-organism biosynthetic process	3
4	GO:1901564	organonitrogen compound metabolic process	3
4	GO:1901700	response to oxygen-containing compound	2
4	GO:0021700	developmental maturation	2
4	GO:0009612	response to mechanical stimulus	2
4	GO:0007028	cytoplasm organization	2
4	GO:0051707	response to other organism	2
4	GO:0006952	defense response	2
4	GO:0051301	cell division	2
4	GO:0007568	aging	2
4	GO:0070482	response to oxygen levels	2
4	GO:0016049	cell growth	2
4	GO:0032879	regulation of localization	2
4	GO:0042493	response to drug	2
4	GO:0035265	organ growth	1
4	GO:0051235	maintenance of location	1
4	GO:0008037	cell recognition	1
4	GO:0090130	tissue migration	1
4	GO:0033059	cellular pigmentation	1
4	GO:0007163	establishment or maintenance of cell polarity	1
4	GO:0016271	tissue death	1
4	GO:1901698	response to nitrogen compound	1
4	GO:0009636	response to toxic substance	1
4	GO:0071496	cellular response to external stimulus	1
4	GO:0061024	membrane organization	1
4	GO:0002682	regulation of immune system process	1
4	GO:0007059	chromosome segregation	1
4	GO:0006959	humoral immune response	1
4	GO:0043954	cellular component maintenance	1
4	GO:0042592	homeostatic process	1
4	GO:0040012	regulation of locomotion	1
4	GO:0010876	lipid localization	1
4	GO:0048066	developmental pigmentation	1
4	GO:0051186	cofactor metabolic process	1
4	GO:0043900	regulation of multi-organism process	1
4	GO:0006091	generation of precursor metabolites and energy	1
4	GO:0009991	response to extracellular stimulus	1
4	GO:0055114	oxidation-reduction process	1
4	GO:0005975	carbohydrate metabolic process	1
4	GO:0007631	feeding behavior	1
4	GO:0044093	positive regulation of molecular function	1
4	GO:0035172	hemocyte proliferation	1
4	GO:0009266	response to temperature stimulus	1
4	GO:0071495	cellular response to endogenous stimulus	1
5	GO:0048731	system development	25
5	GO:0030154	cell differentiation	24
5	GO:0044260	cellular macromolecule metabolic process	20
5	GO:0010467	gene expression	14
5	GO:0032989	cellular component morphogenesis	14
5	GO:0060255	regulation of macromolecule metabolic process	13
5	GO:0006139	nucleobase-containing compound metabolic process	13
5	GO:0019538	protein metabolic process	12
5	GO:0009791	post-embryonic development	12
5	GO:0031323	regulation of cellular metabolic process	11
5	GO:0044765	single-organism transport	11
5	GO:0007276	gamete generation	11
5	GO:0007165	signal transduction	11
5	GO:0044271	cellular nitrogen compound biosynthetic process	11
5	GO:0007552	metamorphosis	10
5	GO:0080090	regulation of primary metabolic process	10
5	GO:1901362	organic cyclic compound biosynthetic process	10
5	GO:0019438	aromatic compound biosynthetic process	10
5	GO:0018130	heterocycle biosynthetic process	10
5	GO:0048736	appendage development	9
5	GO:0051171	regulation of nitrogen compound metabolic process	9
5	GO:0006935	chemotaxis	8
5	GO:0043412	macromolecule modification	8
5	GO:0007010	cytoskeleton organization	8
5	GO:0009059	macromolecule biosynthetic process	8
5	GO:0009889	regulation of biosynthetic process	8
5	GO:0060429	epithelium development	7
5	GO:0006796	phosphate-containing compound metabolic process	7
5	GO:0009790	embryo development	7
5	GO:0048522	positive regulation of cellular process	6
5	GO:0071822	protein complex subunit organization	6
5	GO:0007267	cell-cell signaling	6
5	GO:0048870	cell motility	6
5	GO:0048729	tissue morphogenesis	5
5	GO:0050877	neurological system process	5
5	GO:0070727	cellular macromolecule localization	5
5	GO:0051649	establishment of localization in cell	5
5	GO:0007389	pattern specification process	4
5	GO:0007548	sex differentiation	4
5	GO:0048523	negative regulation of cellular process	4
5	GO:0032535	regulation of cellular component size	4
5	GO:0048646	anatomical structure formation involved in morphogenesis	4
5	GO:0007164	establishment of tissue polarity	4
5	GO:0060537	muscle tissue development	4
5	GO:2000026	regulation of multicellular organismal development	4
5	GO:0048638	regulation of developmental growth	4
5	GO:0007498	mesoderm development	3
5	GO:0007618	mating	3
5	GO:0006082	organic acid metabolic process	3
5	GO:0048584	positive regulation of response to stimulus	3
5	GO:0065003	macromolecular complex assembly	3
5	GO:0023056	positive regulation of signaling	3
5	GO:0022402	cell cycle process	3
5	GO:0044283	small molecule biosynthetic process	3
5	GO:0012501	programmed cell death	3
5	GO:0009892	negative regulation of metabolic process	3
5	GO:1901566	organonitrogen compound biosynthetic process	3
5	GO:0008610	lipid biosynthetic process	3
5	GO:0033057	multicellular organismal reproductive behavior	3
5	GO:0010646	regulation of cell communication	3
5	GO:0022603	regulation of anatomical structure morphogenesis	3
5	GO:0044255	cellular lipid metabolic process	3
5	GO:0060560	developmental growth involved in morphogenesis	3
5	GO:0071702	organic substance transport	3
5	GO:0051276	chromosome organization	3
5	GO:0051093	negative regulation of developmental process	2
5	GO:0014070	response to organic cyclic compound	2
5	GO:0032970	regulation of actin filament-based process	2
5	GO:0033043	regulation of organelle organization	2
5	GO:0030534	adult behavior	2
5	GO:0036293	response to decreased oxygen levels	2
5	GO:0010259	multicellular organismal aging	2
5	GO:0051130	positive regulation of cellular component organization	2
5	GO:0000278	mitotic cell cycle	2
5	GO:0019637	organophosphate metabolic process	2
5	GO:0045184	establishment of protein localization	2
5	GO:0051094	positive regulation of developmental process	2
5	GO:0016192	vesicle-mediated transport	2
5	GO:0070925	organelle assembly	2
5	GO:0009057	macromolecule catabolic process	2
5	GO:0045185	maintenance of protein location	1
5	GO:0060249	anatomical structure homeostasis	1
5	GO:0015980	energy derivation by oxidation of organic compounds	1
5	GO:0008356	asymmetric cell division	1
5	GO:0007559	histolysis	1
5	GO:0002831	regulation of response to biotic stimulus	1
5	GO:0046620	regulation of organ growth	1
5	GO:0035295	tube development	1
5	GO:0048285	organelle fission	1
5	GO:0035150	regulation of tube size	1
5	GO:0031667	response to nutrient levels	1
5	GO:0019730	antimicrobial humoral response	1
5	GO:0032101	regulation of response to external stimulus	1
5	GO:0051668	localization within membrane	1
5	GO:0032880	regulation of protein localization	1
5	GO:0031344	regulation of cell projection organization	1
5	GO:0005976	polysaccharide metabolic process	1
5	GO:0051049	regulation of transport	1
5	GO:0031668	cellular response to extracellular stimulus	1
5	GO:0044089	positive regulation of cellular component biogenesis	1
5	GO:0043603	cellular amide metabolic process	1
5	GO:0007638	mechanosensory behavior	1
5	GO:0017085	response to insecticide	1
5	GO:0097305	response to alcohol	1
5	GO:0051726	regulation of cell cycle	1
5	GO:0006732	coenzyme metabolic process	1
5	GO:0009617	response to bacterium	1
5	GO:0051321	meiotic cell cycle	1
5	GO:0009409	response to cold	1
5	GO:0010243	response to organonitrogen compound	1
5	GO:0050790	regulation of catalytic activity	1
5	GO:0016050	vesicle organization	1
5	GO:0070997	neuron death	1
5	GO:0090132	epithelium migration	1
5	GO:0046700	heterocycle catabolic process	1
5	GO:0044782	cilium organization	1
5	GO:0009893	positive regulation of metabolic process	1
5	GO:0007525	somatic muscle development	1
5	GO:0070887	cellular response to chemical stimulus	1
5	GO:0030048	actin filament-based movement	1
5	GO:1901361	organic cyclic compound catabolic process	1
5	GO:0006914	autophagy	1
5	GO:0071824	protein-DNA complex subunit organization	1
5	GO:0001763	morphogenesis of a branching structure	1
5	GO:0045927	positive regulation of growth	1
5	GO:0050795	regulation of behavior	1
5	GO:0044802	single-organism membrane organization	1
5	GO:0042127	regulation of cell proliferation	1
5	GO:0048790	maintenance of presynaptic active zone structure	1
5	GO:0009620	response to fungus	1
5	GO:0051129	negative regulation of cellular component organization	1
5	GO:1902414	protein localization to cell junction	1
5	GO:0044723	single-organism carbohydrate metabolic process	1
5	GO:0042558	pteridine-containing compound metabolic process	1
5	GO:0007398	ectoderm development	1
5	GO:0019725	cellular homeostasis	1
5	GO:0051651	maintenance of location in cell	1
5	GO:0001558	regulation of cell growth	1
5	GO:0051270	regulation of cellular component movement	1
5	GO:0002697	regulation of immune effector process	1
5	GO:0017145	stem cell division	1
5	GO:0007031	peroxisome organization	1
5	GO:0009408	response to heat	1
5	GO:0050776	regulation of immune response	1
5	GO:0006997	nucleus organization	1
5	GO:0051640	organelle localization	1
5	GO:0023057	negative regulation of signaling	1
5	GO:0033554	cellular response to stress	1
5	GO:0044262	cellular carbohydrate metabolic process	1
5	GO:0070848	response to growth factor stimulus	1
5	GO:0051241	negative regulation of multicellular organismal process	1
5	GO:0007030	Golgi organization	1
5	GO:0010941	regulation of cell death	1
5	GO:0071705	nitrogen compound transport	1
5	GO:0048585	negative regulation of response to stimulus	1
5	GO:0019439	aromatic compound catabolic process	1
5	GO:0044270	cellular nitrogen compound catabolic process	1
5	GO:0030031	cell projection assembly	1
5	GO:0045926	negative regulation of growth	1
5	GO:0060341	regulation of cellular localization	1
5	GO:0051188	cofactor biosynthetic process	1
6	GO:0048513	organ development	16
6	GO:0007399	nervous system development	16
6	GO:0048468	cell development	16
6	GO:0000902	cell morphogenesis	13
6	GO:0002165	instar larval or pupal development	12
6	GO:0090304	nucleic acid metabolic process	11
6	GO:0010468	regulation of gene expression	11
6	GO:0009886	post-embryonic morphogenesis	10
6	GO:0032990	cell part morphogenesis	10
6	GO:0035107	appendage morphogenesis	9
6	GO:0034654	nucleobase-containing compound biosynthetic process	9
6	GO:0048737	imaginal disc-derived appendage development	9
6	GO:0044267	cellular protein metabolic process	9
6	GO:0019219	regulation of nucleobase-containing compound metabolic process	8
6	GO:0031326	regulation of cellular biosynthetic process	8
6	GO:0007292	female gamete generation	8
6	GO:0036211	protein modification process	8
6	GO:0034645	cellular macromolecule biosynthetic process	8
6	GO:0010556	regulation of macromolecule biosynthetic process	7
6	GO:0007166	cell surface receptor signaling pathway	7
6	GO:0016477	cell migration	6
6	GO:0034613	cellular protein localization	5
6	GO:0030855	epithelial cell differentiation	5
6	GO:0045165	cell fate commitment	5
6	GO:0006508	proteolysis	5
6	GO:0002009	morphogenesis of an epithelium	5
6	GO:0016310	phosphorylation	5
6	GO:0019226	transmission of nerve impulse	4
6	GO:0035556	intracellular signal transduction	4
6	GO:0030036	actin cytoskeleton organization	4
6	GO:0042692	muscle cell differentiation	4
6	GO:0045595	regulation of cell differentiation	4
6	GO:0003002	regionalization	4
6	GO:0006811	ion transport	4
6	GO:0014706	striated muscle tissue development	4
6	GO:0055085	transmembrane transport	4
6	GO:0046907	intracellular transport	4
6	GO:0010605	negative regulation of macromolecule metabolic process	3
6	GO:0035272	exocrine system development	3
6	GO:0006461	protein complex assembly	3
6	GO:0016053	organic acid biosynthetic process	3
6	GO:0010647	positive regulation of cell communication	3
6	GO:0043436	oxoacid metabolic process	3
6	GO:0009966	regulation of signal transduction	3
6	GO:0048598	embryonic morphogenesis	3
6	GO:0000226	microtubule cytoskeleton organization	3
6	GO:0007617	mating behavior	3
6	GO:0006915	apoptotic process	2
6	GO:0051493	regulation of cytoskeleton organization	2
6	GO:0030163	protein catabolic process	2
6	GO:0006325	chromatin organization	2
6	GO:0009792	embryo development ending in birth or egg hatching	2
6	GO:0044265	cellular macromolecule catabolic process	2
6	GO:0015031	protein transport	2
6	GO:0034622	cellular macromolecular complex assembly	2
6	GO:0048232	male gamete generation	2
6	GO:0060541	respiratory system development	2
6	GO:1901861	regulation of muscle tissue development	2
6	GO:0001666	response to hypoxia	2
6	GO:0009798	axis specification	2
6	GO:0048863	stem cell differentiation	2
6	GO:0055086	nucleobase-containing small molecule metabolic process	2
6	GO:0002164	larval development	2
6	GO:0010927	cellular component assembly involved in morphogenesis	2
6	GO:0008361	regulation of cell size	2
6	GO:0002520	immune system development	2
6	GO:0008340	determination of adult lifespan	2
6	GO:0015893	drug transport	1
6	GO:0007600	sensory perception	1
6	GO:0000819	sister chromatid segregation	1
6	GO:0035296	regulation of tube diameter	1
6	GO:0042742	defense response to bacterium	1
6	GO:0008343	adult feeding behavior	1
6	GO:0043085	positive regulation of catalytic activity	1
6	GO:0003401	axis elongation	1
6	GO:0046661	male sex differentiation	1
6	GO:0051338	regulation of transferase activity	1
6	GO:0048753	pigment granule organization	1
6	GO:0051174	regulation of phosphorus metabolic process	1
6	GO:0055123	digestive system development	1
6	GO:0090407	organophosphate biosynthetic process	1
6	GO:0006112	energy reserve metabolic process	1
6	GO:0046684	response to pyrethroid	1
6	GO:0050920	regulation of chemotaxis	1
6	GO:0000075	cell cycle checkpoint	1
6	GO:0071896	protein localization to adherens junction	1
6	GO:0071559	response to transforming growth factor beta stimulus	1
6	GO:0071310	cellular response to organic substance	1
6	GO:0033301	cell cycle comprising mitosis without cytokinesis	1
6	GO:0000280	nuclear division	1
6	GO:0009108	coenzyme biosynthetic process	1
6	GO:0051656	establishment of organelle localization	1
6	GO:0042594	response to starvation	1
6	GO:0061458	reproductive system development	1
6	GO:0042386	hemocyte differentiation	1
6	GO:0030575	nuclear body organization	1
6	GO:0006518	peptide metabolic process	1
6	GO:0044042	glucan metabolic process	1
6	GO:0010648	negative regulation of cell communication	1
6	GO:0009631	cold acclimation	1
6	GO:0051050	positive regulation of transport	1
6	GO:0048859	formation of anatomical boundary	1
6	GO:0008285	negative regulation of cell proliferation	1
6	GO:0046680	response to DDT	1
6	GO:0046434	organophosphate catabolic process	1
6	GO:0009880	embryonic pattern specification	1
6	GO:0048102	autophagic cell death	1
6	GO:0002775	antimicrobial peptide production	1
6	GO:1901214	regulation of neuron death	1
6	GO:0006109	regulation of carbohydrate metabolic process	1
6	GO:0006949	syncytium formation	1
6	GO:0035239	tube morphogenesis	1
6	GO:0031669	cellular response to nutrient levels	1
6	GO:0031427	response to methotrexate	1
6	GO:0043467	regulation of generation of precursor metabolites and energy	1
6	GO:0034655	nucleobase-containing compound catabolic process	1
6	GO:0045137	development of primary sexual characteristics	1
6	GO:0042559	pteridine-containing compound biosynthetic process	1
6	GO:0031325	positive regulation of cellular metabolic process	1
6	GO:0072359	circulatory system development	1
6	GO:0010564	regulation of cell cycle process	1
6	GO:0043604	amide biosynthetic process	1
6	GO:0044264	cellular polysaccharide metabolic process	1
6	GO:0044770	cell cycle phase transition	1
6	GO:0034248	regulation of cellular amide metabolic process	1
6	GO:0007126	meiosis	1
6	GO:0045471	response to ethanol	1
6	GO:0046716	muscle cell cellular homeostasis	1
6	GO:0045786	negative regulation of cell cycle	1
6	GO:0010604	positive regulation of macromolecule metabolic process	1
6	GO:0051648	vesicle localization	1
6	GO:0010638	positive regulation of organelle organization	1
6	GO:0010668	ectodermal cell differentiation	1
6	GO:0007346	regulation of mitotic cell cycle	1
6	GO:0045448	mitotic cell cycle, embryonic	1
6	GO:0006643	membrane lipid metabolic process	1
6	GO:0030865	cortical cytoskeleton organization	1
6	GO:0005996	monosaccharide metabolic process	1
6	GO:0002700	regulation of production of molecular mediator of immune response	1
6	GO:0002920	regulation of humoral immune response	1
6	GO:0050832	defense response to fungus	1
6	GO:0006869	lipid transport	1
6	GO:0070252	actin-mediated cell contraction	1
6	GO:0048640	negative regulation of developmental growth	1
6	GO:0051246	regulation of protein metabolic process	1
6	GO:0048639	positive regulation of developmental growth	1
6	GO:0001655	urogenital system development	1
6	GO:0030952	establishment or maintenance of cytoskeleton polarity	1
6	GO:0070201	regulation of establishment of protein localization	1
6	GO:0015748	organophosphate ester transport	1
7	GO:0022008	neurogenesis	15
7	GO:0009887	organ morphogenesis	12
7	GO:0016070	RNA metabolic process	11
7	GO:0048707	instar larval or pupal morphogenesis	10
7	GO:0048858	cell projection morphogenesis	10
7	GO:0000904	cell morphogenesis involved in differentiation	9
7	GO:0048569	post-embryonic organ development	9
7	GO:0035120	post-embryonic appendage morphogenesis	9
7	GO:0007444	imaginal disc development	9
7	GO:0035114	imaginal disc-derived appendage morphogenesis	9
7	GO:0006464	cellular protein modification process	8
7	GO:0048477	oogenesis	7
7	GO:0007423	sensory organ development	7
7	GO:2000112	regulation of cellular macromolecule biosynthetic process	7
7	GO:0007517	muscle organ development	6
7	GO:0051146	striated muscle cell differentiation	4
7	GO:0007281	germ cell development	4
7	GO:0001738	morphogenesis of a polarized epithelium	4
7	GO:0007167	enzyme linked receptor protein signaling pathway	4
7	GO:0007268	synaptic transmission	4
7	GO:0006812	cation transport	4
7	GO:0019752	carboxylic acid metabolic process	3
7	GO:0045168	cell-cell signaling involved in cell fate commitment	3
7	GO:0007416	synapse assembly	3
7	GO:0055001	muscle cell development	3
7	GO:0007369	gastrulation	3
7	GO:0051960	regulation of nervous system development	3
7	GO:0048732	gland development	3
7	GO:0060284	regulation of cell development	3
7	GO:0009967	positive regulation of signal transduction	3
7	GO:0010629	negative regulation of gene expression	3
7	GO:0002064	epithelial cell development	3
7	GO:0007015	actin filament organization	2
7	GO:0007619	courtship behavior	2
7	GO:0007296	vitellogenesis	2
7	GO:0016055	Wnt receptor signaling pathway	2
7	GO:0009954	proximal/distal pattern formation	2
7	GO:0007051	spindle organization	2
7	GO:0048588	developmental cell growth	2
7	GO:0001700	embryonic development via the syncytial blastoderm	2
7	GO:0008063	Toll signaling pathway	2
7	GO:0032956	regulation of actin cytoskeleton organization	2
7	GO:0001709	cell fate determination	2
7	GO:0007283	spermatogenesis	2
7	GO:0006753	nucleoside phosphate metabolic process	2
7	GO:0009953	dorsal/ventral pattern formation	2
7	GO:0007417	central nervous system development	2
7	GO:0035282	segmentation	2
7	GO:0016568	chromatin modification	2
7	GO:0007264	small GTPase mediated signal transduction	2
7	GO:0002168	instar larval development	2
7	GO:0043623	cellular protein complex assembly	2
7	GO:0006820	anion transport	2
7	GO:0048534	hematopoietic or lymphoid organ development	2
7	GO:0006886	intracellular protein transport	2
7	GO:0044257	cellular protein catabolic process	2
7	GO:0048469	cell maturation	2
7	GO:0007422	peripheral nervous system development	2
7	GO:0043632	modification-dependent macromolecule catabolic process	2
7	GO:0051147	regulation of muscle cell differentiation	2
7	GO:0016197	endosomal transport	2
7	GO:0016331	morphogenesis of embryonic epithelium	2
7	GO:0007424	open tracheal system development	2
7	GO:0016482	cytoplasmic transport	2
7	GO:0060179	male mating behavior	2
7	GO:0022604	regulation of cell morphogenesis	2
7	GO:0007067	mitosis	1
7	GO:0009267	cellular response to starvation	1
7	GO:0051223	regulation of protein transport	1
7	GO:0060326	cell chemotaxis	1
7	GO:0007140	male meiosis	1
7	GO:0000578	embryonic axis specification	1
7	GO:0032386	regulation of intracellular transport	1
7	GO:0009952	anterior/posterior pattern specification	1
7	GO:0010675	regulation of cellular carbohydrate metabolic process	1
7	GO:0048864	stem cell development	1
7	GO:0060562	epithelial tube morphogenesis	1
7	GO:0007516	hemocyte development	1
7	GO:0010623	developmental programmed cell death	1
7	GO:0071363	cellular response to growth factor stimulus	1
7	GO:0051347	positive regulation of transferase activity	1
7	GO:0033365	protein localization to organelle	1
7	GO:0072001	renal system development	1
7	GO:0008354	germ cell migration	1
7	GO:0019220	regulation of phosphate metabolic process	1
7	GO:0061138	morphogenesis of a branching epithelium	1
7	GO:0032507	maintenance of protein location in cell	1
7	GO:0048149	behavioral response to ethanol	1
7	GO:0072358	cardiovascular system development	1
7	GO:1901987	regulation of cell cycle phase transition	1
7	GO:0051169	nuclear transport	1
7	GO:0006855	drug transmembrane transport	1
7	GO:0045596	negative regulation of cell differentiation	1
7	GO:0046546	development of primary male sexual characteristics	1
7	GO:0050830	defense response to Gram-positive bacterium	1
7	GO:0010562	positive regulation of phosphorus metabolic process	1
7	GO:0001708	cell fate specification	1
7	GO:0001578	microtubule bundle formation	1
7	GO:0030576	Cajal body organization	1
7	GO:0097479	synaptic vesicle localization	1
7	GO:0010948	negative regulation of cell cycle process	1
7	GO:0097285	cell-type specific apoptotic process	1
7	GO:0046467	membrane lipid biosynthetic process	1
7	GO:0010608	posttranscriptional regulation of gene expression	1
7	GO:0043254	regulation of protein complex assembly	1
7	GO:0051205	protein insertion into membrane	1
7	GO:0048865	stem cell fate commitment	1
7	GO:0007224	smoothened signaling pathway	1
7	GO:0032438	melanosome organization	1
7	GO:0035186	syncytial blastoderm mitotic cell cycle	1
7	GO:0001667	ameboidal cell migration	1
7	GO:0045930	negative regulation of mitotic cell cycle	1
7	GO:0034220	ion transmembrane transport	1
7	GO:0032268	regulation of cellular protein metabolic process	1
7	GO:0072148	epithelial cell fate commitment	1
7	GO:0044772	mitotic cell cycle phase transition	1
7	GO:0048565	digestive tract development	1
7	GO:0034728	nucleosome organization	1
7	GO:0050954	sensory perception of mechanical stimulus	1
7	GO:0048568	embryonic organ development	1
7	GO:0061387	regulation of extent of cell growth	1
7	GO:0032881	regulation of polysaccharide metabolic process	1
7	GO:0060180	female mating behavior	1
7	GO:0031570	DNA integrity checkpoint	1
7	GO:0043574	peroxisomal transport	1
7	GO:0030950	establishment or maintenance of actin cytoskeleton polarity	1
7	GO:0009968	negative regulation of signal transduction	1
7	GO:0043043	peptide biosynthetic process	1
7	GO:0051247	positive regulation of protein metabolic process	1
7	GO:0043588	skin development	1
7	GO:0007186	G-protein coupled receptor signaling pathway	1
7	GO:0048608	reproductive structure development	1
7	GO:0035210	prepupal development	1
7	GO:0000768	syncytium formation by plasma membrane fusion	1
7	GO:0090305	nucleic acid phosphodiester bond hydrolysis	1
7	GO:0019932	second-messenger-mediated signaling	1
7	GO:0051495	positive regulation of cytoskeleton organization	1
7	GO:0019318	hexose metabolic process	1
7	GO:0002759	regulation of antimicrobial humoral response	1
7	GO:0051650	establishment of vesicle localization	1
7	GO:0045792	negative regulation of cell size	1
7	GO:0048789	cytoskeletal matrix organization at active zone	1
7	GO:0006073	cellular glucan metabolic process	1
7	GO:0006665	sphingolipid metabolic process	1
7	GO:0035026	leading edge cell differentiation	1
8	GO:0048699	generation of neurons	10
8	GO:0035220	wing disc development	9
8	GO:0048563	post-embryonic organ morphogenesis	9
8	GO:0032774	RNA biosynthetic process	8
8	GO:0051252	regulation of RNA metabolic process	8
8	GO:0001654	eye development	6
8	GO:0006468	protein phosphorylation	5
8	GO:0060538	skeletal muscle organ development	4
8	GO:0001736	establishment of planar polarity	4
8	GO:0048634	regulation of muscle organ development	3
8	GO:0018193	peptidyl-amino acid modification	3
8	GO:0046394	carboxylic acid biosynthetic process	3
8	GO:0055002	striated muscle cell development	3
8	GO:0009994	oocyte differentiation	3
8	GO:0006396	RNA processing	3
8	GO:0046331	lateral inhibition	3
8	GO:0007431	salivary gland development	3
8	GO:0030001	metal ion transport	2
8	GO:0001703	gastrulation with mouth forming first	2
8	GO:0043543	protein acylation	2
8	GO:0007391	dorsal closure	2
8	GO:0035214	eye-antennal disc development	2
8	GO:0003382	epithelial cell morphogenesis	2
8	GO:0007178	transmembrane receptor protein serine/threonine kinase signaling pathway	2
8	GO:0009950	dorsal/ventral axis specification	2
8	GO:0008154	actin polymerization or depolymerization	2
8	GO:0008049	male courtship behavior	2
8	GO:0007169	transmembrane receptor protein tyrosine kinase signaling pathway	2
8	GO:0015672	monovalent inorganic cation transport	2
8	GO:0030097	hemopoiesis	2
8	GO:0016071	mRNA metabolic process	2
8	GO:0051603	proteolysis involved in cellular protein catabolic process	2
8	GO:0051153	regulation of striated muscle cell differentiation	2
8	GO:2000027	regulation of organ morphogenesis	2
8	GO:0030707	ovarian follicle cell development	2
8	GO:0050803	regulation of synapse structure and activity	2
8	GO:0007447	imaginal disc pattern formation	2
8	GO:0030832	regulation of actin filament length	2
8	GO:0022612	gland morphogenesis	2
8	GO:0007265	Ras protein signal transduction	2
8	GO:0032787	monocarboxylic acid metabolic process	2
8	GO:0009117	nucleotide metabolic process	2
8	GO:0016569	covalent chromatin modification	2
8	GO:0051258	protein polymerization	1
8	GO:0023021	termination of signal transduction	1
8	GO:0015698	inorganic anion transport	1
8	GO:0035027	leading edge cell fate commitment	1
8	GO:0035215	genital disc development	1
8	GO:0030703	eggshell formation	1
8	GO:0008592	regulation of Toll signaling pathway	1
8	GO:0030148	sphingolipid biosynthetic process	1
8	GO:0048806	genitalia development	1
8	GO:0007016	cytoskeletal anchoring at plasma membrane	1
8	GO:0035069	larval midgut histolysis	1
8	GO:0035153	epithelial cell type specification, open tracheal system	1
8	GO:0008360	regulation of cell shape	1
8	GO:0097480	establishment of synaptic vesicle localization	1
8	GO:1901293	nucleoside phosphate biosynthetic process	1
8	GO:0008535	respiratory chain complex IV assembly	1
8	GO:0006913	nucleocytoplasmic transport	1
8	GO:0001704	formation of primary germ layer	1
8	GO:0035277	spiracle morphogenesis, open tracheal system	1
8	GO:1901292	nucleoside phosphate catabolic process	1
8	GO:0007350	blastoderm segmentation	1
8	GO:0007274	neuromuscular synaptic transmission	1
8	GO:0048867	stem cell fate determination	1
8	GO:0007052	mitotic spindle organization	1
8	GO:0016236	macroautophagy	1
8	GO:0042147	retrograde transport, endosome to Golgi	1
8	GO:0000070	mitotic sister chromatid segregation	1
8	GO:0015711	organic anion transport	1
8	GO:0034660	ncRNA metabolic process	1
8	GO:0035218	leg disc development	1
8	GO:0009948	anterior/posterior axis specification	1
8	GO:0000212	meiotic spindle organization	1
8	GO:0008406	gonad development	1
8	GO:0035567	non-canonical Wnt receptor signaling pathway	1
8	GO:0048645	organ formation	1
8	GO:0008277	regulation of G-protein coupled receptor protein signaling pathway	1
8	GO:0046845	branched duct epithelial cell fate determination, open tracheal system	1
8	GO:0007379	segment specification	1
8	GO:0007446	imaginal disc growth	1
8	GO:0061525	hindgut development	1
8	GO:0032270	positive regulation of cellular protein metabolic process	1
8	GO:0006605	protein targeting	1
8	GO:0032388	positive regulation of intracellular transport	1
8	GO:0009123	nucleoside monophosphate metabolic process	1
8	GO:0032509	endosome transport via multivesicular body sorting pathway	1
8	GO:0010769	regulation of cell morphogenesis involved in differentiation	1
8	GO:0051222	positive regulation of protein transport	1
8	GO:0006520	cellular amino acid metabolic process	1
8	GO:0000086	G2/M transition of mitotic cell cycle	1
8	GO:0051961	negative regulation of nervous system development	1
8	GO:0045924	regulation of female receptivity	1
8	GO:0007425	epithelial cell fate determination, open tracheal system	1
8	GO:0007605	sensory perception of sound	1
8	GO:0060271	cilium morphogenesis	1
8	GO:0042063	gliogenesis	1
8	GO:0031334	positive regulation of protein complex assembly	1
8	GO:0045476	nurse cell apoptotic process	1
8	GO:0031399	regulation of protein modification process	1
8	GO:0048754	branching morphogenesis of an epithelial tube	1
8	GO:0048546	digestive tract morphogenesis	1
8	GO:0006006	glucose metabolic process	1
8	GO:0008589	regulation of smoothened signaling pathway	1
8	GO:0022416	chaeta development	1
8	GO:0007507	heart development	1
8	GO:0019935	cyclic-nucleotide-mediated signaling	1
8	GO:0042325	regulation of phosphorylation	1
8	GO:0005977	glycogen metabolic process	1
8	GO:0051225	spindle assembly	1
8	GO:0008544	epidermis development	1
8	GO:0030111	regulation of Wnt receptor signaling pathway	1
8	GO:0007419	ventral cord development	1
8	GO:0019827	stem cell maintenance	1
8	GO:0031647	regulation of protein stability	1
8	GO:0000076	DNA replication checkpoint	1
8	GO:0007300	ovarian nurse cell to oocyte transport	1
8	GO:0061572	actin filament bundle organization	1
8	GO:1901988	negative regulation of cell cycle phase transition	1
8	GO:0035217	labial disc development	1
8	GO:0051962	positive regulation of nervous system development	1
8	GO:0061326	renal tubule development	1
8	GO:0070647	protein modification by small protein conjugation or removal	1
8	GO:0042078	germ-line stem cell division	1
8	GO:0033157	regulation of intracellular protein transport	1
8	GO:0072662	protein localization to peroxisome	1
8	GO:0051764	actin crosslink formation	1
8	GO:0006338	chromatin remodeling	1
8	GO:0071560	cellular response to transforming growth factor beta stimulus	1
8	GO:0048137	spermatocyte division	1
8	GO:1901990	regulation of mitotic cell cycle phase transition	1
8	GO:0035152	regulation of tube architecture, open tracheal system	1
8	GO:0048515	spermatid differentiation	1
8	GO:0045937	positive regulation of phosphate metabolic process	1
8	GO:0002777	antimicrobial peptide biosynthetic process	1
8	GO:0048542	lymph gland development	1
8	GO:0051056	regulation of small GTPase mediated signal transduction	1
8	GO:0072594	establishment of protein localization to organelle	1
8	GO:0002784	regulation of antimicrobial peptide production	1
8	GO:0010631	epithelial cell migration	1
8	GO:0061318	renal filtration cell differentiation	1
9	GO:0030182	neuron differentiation	10
9	GO:0007560	imaginal disc morphogenesis	9
9	GO:0006351	transcription, DNA-dependent	8
9	GO:2001141	regulation of RNA biosynthetic process	7
9	GO:0048749	compound eye development	6
9	GO:0048592	eye morphogenesis	4
9	GO:0007519	skeletal muscle tissue development	4
9	GO:0048599	oocyte development	3
9	GO:0048747	muscle fiber development	3
9	GO:0048065	male courtship behavior, veined wing extension	2
9	GO:0019941	modification-dependent protein catabolic process	2
9	GO:0016202	regulation of striated muscle tissue development	2
9	GO:0010004	gastrulation involving germ band extension	2
9	GO:0018205	peptidyl-lysine modification	2
9	GO:0035222	wing disc pattern formation	2
9	GO:0048104	establishment of body hair or bristle planar orientation	2
9	GO:0008380	RNA splicing	2
9	GO:0050807	regulation of synapse organization	2
9	GO:0006397	mRNA processing	2
9	GO:0006473	protein acetylation	2
9	GO:0007435	salivary gland morphogenesis	2
9	GO:0006631	fatty acid metabolic process	2
9	GO:0072330	monocarboxylic acid biosynthetic process	2
9	GO:0016570	histone modification	2
9	GO:0008064	regulation of actin polymerization or depolymerization	2
9	GO:0007351	tripartite regional subdivision	1
9	GO:0072002	Malpighian tubule development	1
9	GO:0008584	male gonad development	1
9	GO:0003156	regulation of organ formation	1
9	GO:0019933	cAMP-mediated signaling	1
9	GO:0010160	formation of organ boundary	1
9	GO:0002805	regulation of antimicrobial peptide biosynthetic process	1
9	GO:0015696	ammonium transport	1
9	GO:0042384	cilium assembly	1
9	GO:0007303	cytoplasmic transport, nurse cell to oocyte	1
9	GO:0048489	synaptic vesicle transport	1
9	GO:0035309	wing and notum subfield formation	1
9	GO:0003381	epithelial cell morphogenesis involved in gastrulation	1
9	GO:0006814	sodium ion transport	1
9	GO:0045744	negative regulation of G-protein coupled receptor protein signaling pathway	1
9	GO:0008347	glial cell migration	1
9	GO:0007304	chorion-containing eggshell formation	1
9	GO:0007469	antennal development	1
9	GO:0031123	RNA 3'-end processing	1
9	GO:0051057	positive regulation of small GTPase mediated signal transduction	1
9	GO:0043044	ATP-dependent chromatin remodeling	1
9	GO:0007427	epithelial cell migration, open tracheal system	1
9	GO:0010906	regulation of glucose metabolic process	1
9	GO:0007440	foregut morphogenesis	1
9	GO:0008334	histone mRNA metabolic process	1
9	GO:0061319	nephrocyte differentiation	1
9	GO:1901605	alpha-amino acid metabolic process	1
9	GO:0038127	ERBB signaling pathway	1
9	GO:0009165	nucleotide biosynthetic process	1
9	GO:0007450	dorsal/ventral pattern formation, imaginal disc	1
9	GO:0048636	positive regulation of muscle organ development	1
9	GO:0090316	positive regulation of intracellular protein transport	1
9	GO:0007392	initiation of dorsal closure	1
9	GO:0007266	Rho protein signal transduction	1
9	GO:0007442	hindgut morphogenesis	1
9	GO:0015914	phospholipid transport	1
9	GO:0006399	tRNA metabolic process	1
9	GO:0000041	transition metal ion transport	1
9	GO:0035221	genital disc pattern formation	1
9	GO:0060795	cell fate commitment involved in formation of primary germ layer	1
9	GO:0035028	leading edge cell fate determination	1
9	GO:0008652	cellular amino acid biosynthetic process	1
9	GO:0072663	establishment of protein localization to peroxisome	1
9	GO:0034470	ncRNA processing	1
9	GO:0030041	actin filament polymerization	1
9	GO:0007449	proximal/distal pattern formation, imaginal disc	1
9	GO:0001764	neuron migration	1
9	GO:0009161	ribonucleoside monophosphate metabolic process	1
9	GO:0048010	vascular endothelial growth factor receptor signaling pathway	1
9	GO:0006575	cellular modified amino acid metabolic process	1
9	GO:0030718	germ-line stem cell maintenance	1
9	GO:0035162	embryonic hemopoiesis	1
9	GO:0035223	leg disc pattern formation	1
9	GO:0009124	nucleoside monophosphate biosynthetic process	1
9	GO:0007352	zygotic specification of dorsal/ventral axis	1
9	GO:0014016	neuroblast differentiation	1
9	GO:0007448	anterior/posterior pattern specification, imaginal disc	1
9	GO:0035051	cardiocyte differentiation	1
9	GO:0007286	spermatid development	1
9	GO:0032271	regulation of protein polymerization	1
9	GO:0032446	protein modification by small protein conjugation	1
9	GO:0090175	regulation of establishment of planar polarity	1
9	GO:0010389	regulation of G2/M transition of mitotic cell cycle	1
9	GO:1901991	negative regulation of mitotic cell cycle phase transition	1
9	GO:0060446	branching involved in open tracheal system development	1
9	GO:0001705	ectoderm formation	1
9	GO:0035263	genital disc sexually dimorphic development	1
9	GO:0009166	nucleotide catabolic process	1
9	GO:0090251	protein localization involved in establishment of planar polarity	1
9	GO:0009913	epidermal cell differentiation	1
9	GO:0001932	regulation of protein phosphorylation	1
9	GO:0010001	glial cell differentiation	1
9	GO:0035156	fusion cell fate specification	1
9	GO:0051168	nuclear export	1
9	GO:0007179	transforming growth factor beta receptor signaling pathway	1
9	GO:0018212	peptidyl-tyrosine modification	1
9	GO:0035096	larval midgut cell programmed cell death	1
9	GO:0030177	positive regulation of Wnt receptor signaling pathway	1
9	GO:0050767	regulation of neurogenesis	1
9	GO:0046578	regulation of Ras protein signal transduction	1
9	GO:0046822	regulation of nucleocytoplasmic transport	1
9	GO:0090306	spindle assembly involved in meiosis	1
9	GO:0051017	actin filament bundle assembly	1
9	GO:0061333	renal tubule morphogenesis	1
9	GO:0042249	establishment of planar polarity of embryonic epithelium	1
9	GO:0031401	positive regulation of protein modification process	1
9	GO:0010498	proteasomal protein catabolic process	1
9	GO:0045570	regulation of imaginal disc growth	1
9	GO:0003383	apical constriction	1
9	GO:0035151	regulation of tube size, open tracheal system	1
9	GO:0043549	regulation of kinase activity	1
9	GO:0042327	positive regulation of phosphorylation	1
9	GO:0030539	male genitalia development	1
9	GO:0035166	post-embryonic hemopoiesis	1
9	GO:0035146	tube fusion	1
9	GO:0045879	negative regulation of smoothened signaling pathway	1
9	GO:0008407	chaeta morphogenesis	1
10	GO:0048666	neuron development	10
10	GO:0007472	wing disc morphogenesis	9
10	GO:0006355	regulation of transcription, DNA-dependent	7
10	GO:0001745	compound eye morphogenesis	4
10	GO:0046530	photoreceptor cell differentiation	3
10	GO:0048741	skeletal muscle fiber development	3
10	GO:0006366	transcription from RNA polymerase II promoter	3
10	GO:0051963	regulation of synapse assembly	2
10	GO:0006475	internal protein amino acid acetylation	2
10	GO:0018394	peptidyl-lysine acetylation	2
10	GO:0016545	male courtship behavior, veined wing vibration	2
10	GO:0048641	regulation of skeletal muscle tissue development	2
10	GO:0006633	fatty acid biosynthetic process	2
10	GO:0007308	oocyte construction	2
10	GO:0006511	ubiquitin-dependent protein catabolic process	2
10	GO:0007173	epidermal growth factor receptor signaling pathway	1
10	GO:0009156	ribonucleoside monophosphate biosynthetic process	1
10	GO:0035224	genital disc anterior/posterior pattern formation	1
10	GO:0035315	hair cell differentiation	1
10	GO:0001934	positive regulation of protein phosphorylation	1
10	GO:0046663	dorsal closure, leading edge cell differentiation	1
10	GO:0007093	mitotic cell cycle checkpoint	1
10	GO:0006352	DNA-dependent transcription, initiation	1
10	GO:0048106	establishment of thoracic bristle planar orientation	1
10	GO:0016567	protein ubiquitination	1
10	GO:0045664	regulation of neuron differentiation	1
10	GO:0033674	positive regulation of kinase activity	1
10	GO:0061320	pericardial nephrocyte differentiation	1
10	GO:0032273	positive regulation of protein polymerization	1
10	GO:0031124	mRNA 3'-end processing	1
10	GO:0007432	salivary gland boundary specification	1
10	GO:0042398	cellular modified amino acid biosynthetic process	1
10	GO:0007455	eye-antennal disc morphogenesis	1
10	GO:0010002	cardioblast differentiation	1
10	GO:0043949	regulation of cAMP-mediated signaling	1
10	GO:0006379	mRNA cleavage	1
10	GO:0010972	negative regulation of G2/M transition of mitotic cell cycle	1
10	GO:0035158	regulation of tube diameter, open tracheal system	1
10	GO:0046579	positive regulation of Ras protein signal transduction	1
10	GO:0014017	neuroblast fate commitment	1
10	GO:0000375	RNA splicing, via transesterification reactions	1
10	GO:0008033	tRNA processing	1
10	GO:0035099	hemocyte migration	1
10	GO:0046824	positive regulation of nucleocytoplasmic transport	1
10	GO:0007370	ventral furrow formation	1
10	GO:0006611	protein export from nucleus	1
10	GO:0003384	apical constriction involved in gastrulation	1
10	GO:0048490	anterograde synaptic vesicle transport	1
10	GO:0043486	histone exchange	1
10	GO:0060071	Wnt receptor signaling pathway, planar cell polarity pathway	1
10	GO:0008595	anterior/posterior axis specification, embryo	1
10	GO:0007378	amnioserosa formation	1
10	GO:0000394	RNA splicing, via endonucleolytic cleavage and ligation	1
10	GO:0050684	regulation of mRNA processing	1
10	GO:0061327	anterior Malpighian tubule development	1
10	GO:0018108	peptidyl-tyrosine phosphorylation	1
10	GO:0043631	RNA polyadenylation	1
10	GO:0007306	eggshell chorion assembly	1
10	GO:0006625	protein targeting to peroxisome	1
10	GO:0021781	glial cell fate commitment	1
10	GO:0043484	regulation of RNA splicing	1
10	GO:0048100	wing disc anterior/posterior pattern formation	1
10	GO:0048601	oocyte morphogenesis	1
10	GO:0070873	regulation of glycogen metabolic process	1
10	GO:0038032	termination of G-protein coupled receptor signaling pathway	1
10	GO:0007053	spindle assembly involved in male meiosis	1
10	GO:0001712	ectodermal cell fate commitment	1
10	GO:0048619	embryonic hindgut morphogenesis	1
10	GO:0035167	larval lymph gland hemopoiesis	1
10	GO:0035070	salivary gland histolysis	1
10	GO:0006760	folic acid-containing compound metabolic process	1
10	GO:0007473	wing disc proximal/distal pattern formation	1
10	GO:0035147	branch fusion, open tracheal system	1
10	GO:0006825	copper ion transport	1
10	GO:0007479	leg disc proximal/distal pattern formation	1
10	GO:0030833	regulation of actin filament polymerization	1
10	GO:0035914	skeletal muscle cell differentiation	1
10	GO:1901607	alpha-amino acid biosynthetic process	1
10	GO:0048098	antennal joint development	1
10	GO:0045859	regulation of protein kinase activity	1
11	GO:0031175	neuron projection development	9
11	GO:0007476	imaginal disc-derived wing morphogenesis	9
11	GO:0048667	cell morphogenesis involved in neuron differentiation	8
11	GO:0007528	neuromuscular junction development	3
11	GO:0001754	eye photoreceptor cell differentiation	3
11	GO:0042461	photoreceptor cell development	3
11	GO:0048742	regulation of skeletal muscle fiber development	2
11	GO:0006357	regulation of transcription from RNA polymerase II promoter	2
11	GO:0018393	internal peptidyl-lysine acetylation	2
11	GO:0007309	oocyte axis specification	2
11	GO:0045433	male courtship behavior, veined wing generated song production	2
11	GO:0008038	neuron recognition	1
11	GO:0009396	folic acid-containing compound biosynthetic process	1
11	GO:0046825	regulation of protein export from nucleus	1
11	GO:0007403	glial cell fate determination	1
11	GO:0007400	neuroblast fate determination	1
11	GO:0046900	tetrahydrofolylpolyglutamate metabolic process	1
11	GO:0046843	dorsal appendage formation	1
11	GO:0044774	mitotic DNA integrity checkpoint	1
11	GO:0045860	positive regulation of protein kinase activity	1
11	GO:0007458	progression of morphogenetic furrow involved in compound eye morphogenesis	1
11	GO:0035071	salivary gland cell autophagic cell death	1
11	GO:0045704	regulation of salivary gland boundary specification	1
11	GO:0030497	fatty acid elongation	1
11	GO:0030838	positive regulation of actin filament polymerization	1
11	GO:0000377	RNA splicing, via transesterification reactions with bulged adenosine as nucleophile	1
11	GO:0001715	ectodermal cell fate specification	1
11	GO:0051965	positive regulation of synapse assembly	1
11	GO:0035168	larval lymph gland hemocyte differentiation	1
11	GO:0043161	proteasomal ubiquitin-dependent protein catabolic process	1
11	GO:0006378	mRNA polyadenylation	1
11	GO:0003402	planar cell polarity pathway involved in axis elongation	1
11	GO:0014902	myotube differentiation	1
11	GO:0006388	tRNA splicing, via endonucleolytic cleavage and ligation	1
11	GO:0043950	positive regulation of cAMP-mediated signaling	1
11	GO:0006367	transcription initiation from RNA polymerase II promoter	1
11	GO:0007354	zygotic determination of anterior/posterior axis, embryo	1
11	GO:0007443	Malpighian tubule morphogenesis	1
11	GO:0051964	negative regulation of synapse assembly	1
11	GO:0042787	protein ubiquitination involved in ubiquitin-dependent protein catabolic process	1
11	GO:0006398	histone mRNA 3'-end processing	1
11	GO:0035434	copper ion transmembrane transport	1
11	GO:0035316	non-sensory hair organization	1
11	GO:0035029	dorsal closure, leading edge cell fate commitment	1
12	GO:0048812	neuron projection morphogenesis	9
12	GO:0061564	axon development	7
12	GO:0051124	synaptic growth at neuromuscular junction	3
12	GO:0008586	imaginal disc-derived wing vein morphogenesis	3
12	GO:0001751	compound eye photoreceptor cell differentiation	3
12	GO:0042462	eye photoreceptor cell development	3
12	GO:0007474	imaginal disc-derived wing vein specification	2
12	GO:0016573	histone acetylation	2
12	GO:0007310	oocyte dorsal/ventral axis specification	2
12	GO:0045010	actin nucleation	1
12	GO:0000398	mRNA splicing, via spliceosome	1
12	GO:0045705	negative regulation of salivary gland boundary specification	1
12	GO:0008587	imaginal disc-derived wing margin morphogenesis	1
12	GO:0008594	photoreceptor cell morphogenesis	1
12	GO:0000379	tRNA-type intron splice site recognition and cleavage	1
12	GO:0007393	dorsal closure, leading edge cell fate determination	1
12	GO:0033314	mitotic DNA replication checkpoint	1
12	GO:0046827	positive regulation of protein export from nucleus	1
12	GO:0007520	myoblast fusion	1
12	GO:0030509	BMP signaling pathway	1
12	GO:0016358	dendrite development	1
12	GO:0010975	regulation of neuron projection development	1
12	GO:0061334	cell rearrangement involved in Malpighian tubule morphogenesis	1
12	GO:0032147	activation of protein kinase activity	1
12	GO:0035317	imaginal disc-derived wing hair organization	1
12	GO:0031146	SCF-dependent proteasomal ubiquitin-dependent protein catabolic process	1
12	GO:0046901	tetrahydrofolylpolyglutamate biosynthetic process	1
13	GO:0097485	neuron projection guidance	7
13	GO:0007409	axonogenesis	7
13	GO:0042051	compound eye photoreceptor development	3
13	GO:0045466	R7 cell differentiation	2
13	GO:1990138	neuron projection extension	2
13	GO:0008582	regulation of synaptic growth at neuromuscular junction	2
13	GO:0007475	apposition of dorsal and ventral imaginal disc-derived wing surfaces	1
13	GO:0034314	Arp2/3 complex-mediated actin nucleation	1
13	GO:0043967	histone H4 acetylation	1
13	GO:0000380	alternative mRNA splicing, via spliceosome	1
13	GO:0048024	regulation of mRNA splicing, via spliceosome	1
13	GO:0061352	cell chemotaxis involved in Malpighian tubule morphogenesis	1
13	GO:0048813	dendrite morphogenesis	1
13	GO:0035321	maintenance of imaginal disc-derived wing hair orientation	1
13	GO:0007313	maternal specification of dorsal/ventral axis, oocyte, soma encoded	1
13	GO:0007311	maternal specification of dorsal/ventral axis, oocyte, germ-line encoded	1
14	GO:0007411	axon guidance	7
14	GO:0045467	R7 cell development	2
14	GO:0048675	axon extension	2
14	GO:1902284	neuron projection extension involved in neuron projection guidance	2
14	GO:0045887	positive regulation of synaptic growth at neuromuscular junction	1
14	GO:0045886	negative regulation of synaptic growth at neuromuscular junction	1
14	GO:0050770	regulation of axonogenesis	1
14	GO:0043984	histone H4-K16 acetylation	1
14	GO:0042052	rhabdomere development	1
14	GO:0000381	regulation of alternative mRNA splicing, via spliceosome	1
14	GO:0061353	BMP signaling pathway involved in Malpighian tubule cell chemotaxis	1
14	GO:0007412	axon target recognition	1
15	GO:0008045	motor neuron axon guidance	2
15	GO:0048846	axon extension involved in axon guidance	2
15	GO:0072499	photoreceptor cell axon guidance	1
15	GO:0031290	retinal ganglion cell axon guidance	1
15	GO:0016198	axon choice point recognition	1
15	GO:0030516	regulation of axon extension	1
16	GO:0016199	axon midline choice point recognition	1
16	GO:0048841	regulation of axon extension involved in axon guidance	1
