# Supplementary material for: Preparing for Winter: The Transcriptomic Response Associated with Different Day Lengths in Drosophila montana
Source: G3 (Bethesda). 2016 Mar 11;6(5):1373–81. doi: 10.1534/g3.116.027870 (PMC4856088; doi:10.1534/g3.116.027870)
Supplement: Supplemental Material [file supp_g3.116.027870_TableS2.xlsx]

## Sheet: ALL_ACTIVE_GOTERMS
Table S2 | GO terms associated with genes DE in response to a shorter day length in non-diapausing females
Level	GO ID	Term	#Seqs
2	GO:0044699	single-organism process	30
2	GO:0009987	cellular process	29
2	GO:0008152	metabolic process	20
2	GO:0065007	biological regulation	19
2	GO:0071840	cellular component organization or biogenesis	15
2	GO:0032501	multicellular organismal process	15
2	GO:0051179	localization	15
2	GO:0032502	developmental process	15
2	GO:0050896	response to stimulus	14
2	GO:0023052	signaling	9
2	GO:0000003	reproduction	5
2	GO:0040011	locomotion	5
2	GO:0002376	immune system process	3
2	GO:0022610	biological adhesion	2
2	GO:0040007	growth	1
2	GO:0048511	rhythmic process	1
2	GO:0051704	multi-organism process	1
3	GO:0044763	single-organism cellular process	28
3	GO:0044238	primary metabolic process	17
3	GO:0050789	regulation of biological process	17
3	GO:0071704	organic substance metabolic process	17
3	GO:0016043	cellular component organization	15
3	GO:0044707	single-multicellular organism process	15
3	GO:0044767	single-organism developmental process	14
3	GO:0048856	anatomical structure development	14
3	GO:0051234	establishment of localization	12
3	GO:0044237	cellular metabolic process	12
3	GO:0044700	single organism signaling	9
3	GO:0009058	biosynthetic process	8
3	GO:0006807	nitrogen compound metabolic process	7
3	GO:0009605	response to external stimulus	6
3	GO:0022414	reproductive process	5
3	GO:0065008	regulation of biological quality	5
3	GO:0042221	response to chemical stimulus	5
3	GO:0006950	response to stress	4
3	GO:0008283	cell proliferation	3
3	GO:0033036	macromolecule localization	3
3	GO:0044710	single-organism metabolic process	3
3	GO:0009056	catabolic process	2
3	GO:0019953	sexual reproduction	2
3	GO:0007610	behavior	2
3	GO:0032504	multicellular organism reproduction	2
3	GO:0048610	cellular process involved in reproduction	2
3	GO:0006955	immune response	1
3	GO:0044085	cellular component biogenesis	1
3	GO:0009628	response to abiotic stimulus	1
3	GO:0007623	circadian rhythm	1
3	GO:0016265	death	1
3	GO:0009607	response to biotic stimulus	1
3	GO:0051674	localization of cell	1
4	GO:0050794	regulation of cellular process	16
4	GO:0043170	macromolecule metabolic process	15
4	GO:0007275	multicellular organismal development	13
4	GO:0009653	anatomical structure morphogenesis	11
4	GO:0006810	transport	11
4	GO:0007154	cell communication	10
4	GO:0048869	cellular developmental process	10
4	GO:0051716	cellular response to stimulus	9
4	GO:1901576	organic substance biosynthetic process	8
4	GO:0006996	organelle organization	8
4	GO:0034641	cellular nitrogen compound metabolic process	7
4	GO:0006725	cellular aromatic compound metabolic process	7
4	GO:0046483	heterocycle metabolic process	7
4	GO:0051641	cellular localization	7
4	GO:1901360	organic cyclic compound metabolic process	7
4	GO:0044249	cellular biosynthetic process	7
4	GO:0019222	regulation of metabolic process	6
4	GO:0006928	cellular component movement	6
4	GO:0048518	positive regulation of biological process	6
4	GO:0051239	regulation of multicellular organismal process	6
4	GO:0032879	regulation of localization	6
4	GO:0030030	cell projection organization	5
4	GO:0048519	negative regulation of biological process	5
4	GO:0003006	developmental process involved in reproduction	5
4	GO:0023051	regulation of signaling	4
4	GO:0007049	cell cycle	4
4	GO:0042330	taxis	4
4	GO:0048583	regulation of response to stimulus	4
4	GO:0007017	microtubule-based process	3
4	GO:0003008	system process	3
4	GO:0035637	multicellular organismal signaling	3
4	GO:0006793	phosphorus metabolic process	3
4	GO:0043933	macromolecular complex subunit organization	3
4	GO:0008037	cell recognition	2
4	GO:0044248	cellular catabolic process	2
4	GO:0050793	regulation of developmental process	2
4	GO:0044708	single-organism behavior	2
4	GO:0050808	synapse organization	2
4	GO:0009888	tissue development	2
4	GO:0002682	regulation of immune system process	2
4	GO:0042592	homeostatic process	2
4	GO:1901575	organic substance catabolic process	2
4	GO:0051301	cell division	2
4	GO:0008104	protein localization	2
4	GO:0007155	cell adhesion	2
4	GO:0048609	multicellular organismal reproductive process	2
4	GO:0009991	response to extracellular stimulus	2
4	GO:0055114	oxidation-reduction process	2
4	GO:0044702	single organism reproductive process	2
4	GO:0022412	cellular process involved in reproduction in multicellular organism	2
4	GO:0035172	hemocyte proliferation	2
4	GO:0042752	regulation of circadian rhythm	1
4	GO:0008219	cell death	1
4	GO:0021700	developmental maturation	1
4	GO:0090066	regulation of anatomical structure size	1
4	GO:0030029	actin filament-based process	1
4	GO:0006790	sulfur compound metabolic process	1
4	GO:0007163	establishment or maintenance of cell polarity	1
4	GO:0022607	cellular component assembly	1
4	GO:0071496	cellular response to external stimulus	1
4	GO:0006970	response to osmotic stress	1
4	GO:0048589	developmental growth	1
4	GO:0051707	response to other organism	1
4	GO:0006952	defense response	1
4	GO:0007059	chromosome segregation	1
4	GO:1901135	carbohydrate derivative metabolic process	1
4	GO:0040012	regulation of locomotion	1
4	GO:0022411	cellular component disassembly	1
4	GO:0007568	aging	1
4	GO:0051186	cofactor metabolic process	1
4	GO:0030431	sleep	1
4	GO:0044281	small molecule metabolic process	1
4	GO:0051128	regulation of cellular component organization	1
4	GO:0016049	cell growth	1
4	GO:0005975	carbohydrate metabolic process	1
4	GO:0060004	reflex	1
4	GO:0044711	single-organism biosynthetic process	1
4	GO:1901564	organonitrogen compound metabolic process	1
4	GO:0006403	RNA localization	1
4	GO:1901657	glycosyl compound metabolic process	1
5	GO:0044260	cellular macromolecule metabolic process	11
5	GO:0019538	protein metabolic process	11
5	GO:0048731	system development	10
5	GO:0044765	single-organism transport	10
5	GO:0030154	cell differentiation	8
5	GO:0010467	gene expression	7
5	GO:0006139	nucleobase-containing compound metabolic process	7
5	GO:0007165	signal transduction	7
5	GO:0032989	cellular component morphogenesis	7
5	GO:0080090	regulation of primary metabolic process	6
5	GO:0060255	regulation of macromolecule metabolic process	6
5	GO:0031323	regulation of cellular metabolic process	6
5	GO:0009059	macromolecule biosynthetic process	6
5	GO:0071702	organic substance transport	6
5	GO:1901362	organic cyclic compound biosynthetic process	5
5	GO:0043412	macromolecule modification	5
5	GO:0048523	negative regulation of cellular process	5
5	GO:0051171	regulation of nitrogen compound metabolic process	5
5	GO:0009889	regulation of biosynthetic process	5
5	GO:0019438	aromatic compound biosynthetic process	5
5	GO:0018130	heterocycle biosynthetic process	5
5	GO:0051649	establishment of localization in cell	5
5	GO:0009790	embryo development	5
5	GO:0044271	cellular nitrogen compound biosynthetic process	5
5	GO:0051049	regulation of transport	4
5	GO:0006935	chemotaxis	4
5	GO:0007267	cell-cell signaling	4
5	GO:0048736	appendage development	4
5	GO:0000278	mitotic cell cycle	4
5	GO:0010646	regulation of cell communication	4
5	GO:0009791	post-embryonic development	4
5	GO:0016192	vesicle-mediated transport	4
5	GO:0051640	organelle localization	4
5	GO:0071705	nitrogen compound transport	4
5	GO:0060341	regulation of cellular localization	4
5	GO:0007552	metamorphosis	3
5	GO:0048285	organelle fission	3
5	GO:0048584	positive regulation of response to stimulus	3
5	GO:0048522	positive regulation of cellular process	3
5	GO:0007389	pattern specification process	3
5	GO:0071822	protein complex subunit organization	3
5	GO:0022402	cell cycle process	3
5	GO:0050877	neurological system process	3
5	GO:0007548	sex differentiation	3
5	GO:0009892	negative regulation of metabolic process	3
5	GO:0048646	anatomical structure formation involved in morphogenesis	3
5	GO:0006796	phosphate-containing compound metabolic process	3
5	GO:0033554	cellular response to stress	3
5	GO:0044057	regulation of system process	3
5	GO:0051276	chromosome organization	3
5	GO:0007498	mesoderm development	2
5	GO:0031667	response to nutrient levels	2
5	GO:0007010	cytoskeleton organization	2
5	GO:0070727	cellular macromolecule localization	2
5	GO:0009893	positive regulation of metabolic process	2
5	GO:0080134	regulation of response to stress	2
5	GO:0007276	gamete generation	2
5	GO:0023057	negative regulation of signaling	2
5	GO:0009057	macromolecule catabolic process	2
5	GO:0048585	negative regulation of response to stimulus	2
5	GO:0007626	locomotory behavior	1
5	GO:0031503	protein complex localization	1
5	GO:0048729	tissue morphogenesis	1
5	GO:0072521	purine-containing compound metabolic process	1
5	GO:0006082	organic acid metabolic process	1
5	GO:0035295	tube development	1
5	GO:0051240	positive regulation of multicellular organismal process	1
5	GO:0032880	regulation of protein localization	1
5	GO:0007018	microtubule-based movement	1
5	GO:0031668	cellular response to extracellular stimulus	1
5	GO:0045087	innate immune response	1
5	GO:0023056	positive regulation of signaling	1
5	GO:0002684	positive regulation of immune system process	1
5	GO:0051726	regulation of cell cycle	1
5	GO:0006732	coenzyme metabolic process	1
5	GO:0009617	response to bacterium	1
5	GO:0010259	multicellular organismal aging	1
5	GO:0044283	small molecule biosynthetic process	1
5	GO:0070997	neuron death	1
5	GO:0007622	rhythmic behavior	1
5	GO:0044782	cilium organization	1
5	GO:0060429	epithelium development	1
5	GO:0032984	macromolecular complex disassembly	1
5	GO:1901566	organonitrogen compound biosynthetic process	1
5	GO:0032535	regulation of cellular component size	1
5	GO:0050795	regulation of behavior	1
5	GO:0042753	positive regulation of circadian rhythm	1
5	GO:0042127	regulation of cell proliferation	1
5	GO:0044723	single-organism carbohydrate metabolic process	1
5	GO:0019725	cellular homeostasis	1
5	GO:0051270	regulation of cellular component movement	1
5	GO:0045184	establishment of protein localization	1
5	GO:0050776	regulation of immune response	1
5	GO:0048878	chemical homeostasis	1
5	GO:0030010	establishment of cell polarity	1
5	GO:0060560	developmental growth involved in morphogenesis	1
5	GO:0006997	nucleus organization	1
5	GO:2000026	regulation of multicellular organismal development	1
5	GO:0009651	response to salt stress	1
5	GO:0070925	organelle assembly	1
5	GO:0007030	Golgi organization	1
5	GO:0010941	regulation of cell death	1
5	GO:0030155	regulation of cell adhesion	1
5	GO:0007635	chemosensory behavior	1
5	GO:0030031	cell projection assembly	1
5	GO:0048870	cell motility	1
6	GO:0007399	nervous system development	8
6	GO:0048513	organ development	7
6	GO:0044267	cellular protein metabolic process	7
6	GO:0090304	nucleic acid metabolic process	6
6	GO:0006811	ion transport	6
6	GO:0000902	cell morphogenesis	6
6	GO:0006508	proteolysis	6
6	GO:0034645	cellular macromolecule biosynthetic process	6
6	GO:0048468	cell development	6
6	GO:0010556	regulation of macromolecule biosynthetic process	5
6	GO:0032990	cell part morphogenesis	5
6	GO:0035556	intracellular signal transduction	5
6	GO:0034654	nucleobase-containing compound biosynthetic process	5
6	GO:0010468	regulation of gene expression	5
6	GO:0019219	regulation of nucleobase-containing compound metabolic process	5
6	GO:0031326	regulation of cellular biosynthetic process	5
6	GO:0036211	protein modification process	5
6	GO:0009886	post-embryonic morphogenesis	4
6	GO:0035107	appendage morphogenesis	4
6	GO:0002165	instar larval or pupal development	4
6	GO:0010605	negative regulation of macromolecule metabolic process	3
6	GO:0031644	regulation of neurological system process	3
6	GO:0019226	transmission of nerve impulse	3
6	GO:0031324	negative regulation of cellular metabolic process	3
6	GO:0006897	endocytosis	3
6	GO:0051172	negative regulation of nitrogen compound metabolic process	3
6	GO:0048737	imaginal disc-derived appendage development	3
6	GO:0000280	nuclear division	3
6	GO:0051656	establishment of organelle localization	3
6	GO:0061458	reproductive system development	3
6	GO:0003002	regionalization	3
6	GO:0009890	negative regulation of biosynthetic process	3
6	GO:0045137	development of primary sexual characteristics	3
6	GO:0055085	transmembrane transport	3
6	GO:0015849	organic acid transport	3
6	GO:0016310	phosphorylation	3
6	GO:0030163	protein catabolic process	2
6	GO:0006325	chromatin organization	2
6	GO:0055123	digestive system development	2
6	GO:0044265	cellular macromolecule catabolic process	2
6	GO:0010648	negative regulation of cell communication	2
6	GO:0009880	embryonic pattern specification	2
6	GO:0009966	regulation of signal transduction	2
6	GO:0007502	digestive tract mesoderm development	2
6	GO:0006974	response to DNA damage stimulus	2
6	GO:0031325	positive regulation of cellular metabolic process	2
6	GO:0046903	secretion	2
6	GO:0009798	axis specification	2
6	GO:0000226	microtubule cytoskeleton organization	2
6	GO:0000910	cytokinesis	2
6	GO:0010604	positive regulation of macromolecule metabolic process	2
6	GO:0051648	vesicle localization	2
6	GO:0050919	negative chemotaxis	2
6	GO:0006836	neurotransmitter transport	2
6	GO:0010927	cellular component assembly involved in morphogenesis	2
6	GO:0060627	regulation of vesicle-mediated transport	2
6	GO:0051051	negative regulation of transport	1
6	GO:0000819	sister chromatid segregation	1
6	GO:0035272	exocrine system development	1
6	GO:0042742	defense response to bacterium	1
6	GO:0015844	monoamine transport	1
6	GO:0048512	circadian behavior	1
6	GO:2000145	regulation of cell motility	1
6	GO:0007349	cellularization	1
6	GO:0051174	regulation of phosphorus metabolic process	1
6	GO:0009792	embryo development ending in birth or egg hatching	1
6	GO:0016053	organic acid biosynthetic process	1
6	GO:0051647	nucleus localization	1
6	GO:0051304	chromosome separation	1
6	GO:0031347	regulation of defense response	1
6	GO:0030036	actin cytoskeleton organization	1
6	GO:0043241	protein complex disassembly	1
6	GO:0007584	response to nutrient	1
6	GO:0015031	protein transport	1
6	GO:0010647	positive regulation of cell communication	1
6	GO:0080135	regulation of cellular response to stress	1
6	GO:0042594	response to starvation	1
6	GO:0042386	hemocyte differentiation	1
6	GO:0045995	regulation of embryonic development	1
6	GO:0007166	cell surface receptor signaling pathway	1
6	GO:0030575	nuclear body organization	1
6	GO:0043436	oxoacid metabolic process	1
6	GO:0051050	positive regulation of transport	1
6	GO:0050890	cognition	1
6	GO:0048232	male gamete generation	1
6	GO:0060541	respiratory system development	1
6	GO:1901214	regulation of neuron death	1
6	GO:0015837	amine transport	1
6	GO:0035239	tube morphogenesis	1
6	GO:0016051	carbohydrate biosynthetic process	1
6	GO:0031669	cellular response to nutrient levels	1
6	GO:0051642	centrosome localization	1
6	GO:0015850	organic hydroxy compound transport	1
6	GO:0007292	female gamete generation	1
6	GO:0055088	lipid homeostasis	1
6	GO:0048598	embryonic morphogenesis	1
6	GO:0051653	spindle localization	1
6	GO:0009891	positive regulation of biosynthetic process	1
6	GO:0034613	cellular protein localization	1
6	GO:0008298	intracellular mRNA localization	1
6	GO:0072359	circulatory system development	1
6	GO:0035206	regulation of hemocyte proliferation	1
6	GO:0044770	cell cycle phase transition	1
6	GO:0016477	cell migration	1
6	GO:0045165	cell fate commitment	1
6	GO:0051173	positive regulation of nitrogen compound metabolic process	1
6	GO:0002009	morphogenesis of an epithelium	1
6	GO:0046907	intracellular transport	1
6	GO:0048520	positive regulation of behavior	1
6	GO:0007346	regulation of mitotic cell cycle	1
6	GO:0030865	cortical cytoskeleton organization	1
6	GO:0005996	monosaccharide metabolic process	1
6	GO:0032418	lysosome localization	1
6	GO:0003001	generation of a signal involved in cell-cell signaling	1
6	GO:0055086	nucleobase-containing small molecule metabolic process	1
6	GO:0002164	larval development	1
6	GO:0008361	regulation of cell size	1
6	GO:0046660	female sex differentiation	1
6	GO:0002520	immune system development	1
6	GO:0050778	positive regulation of immune response	1
6	GO:0006884	cell volume homeostasis	1
6	GO:0051246	regulation of protein metabolic process	1
6	GO:0001655	urogenital system development	1
6	GO:0070201	regulation of establishment of protein localization	1
6	GO:0008340	determination of adult lifespan	1
7	GO:0016070	RNA metabolic process	6
7	GO:0022008	neurogenesis	6
7	GO:0006464	cellular protein modification process	5
7	GO:2000112	regulation of cellular macromolecule biosynthetic process	5
7	GO:0048858	cell projection morphogenesis	5
7	GO:0006820	anion transport	5
7	GO:0000904	cell morphogenesis involved in differentiation	4
7	GO:0007264	small GTPase mediated signal transduction	4
7	GO:0035120	post-embryonic appendage morphogenesis	4
7	GO:0007067	mitosis	3
7	GO:0009887	organ morphogenesis	3
7	GO:0048707	instar larval or pupal morphogenesis	3
7	GO:0007417	central nervous system development	3
7	GO:0010558	negative regulation of macromolecule biosynthetic process	3
7	GO:0048569	post-embryonic organ development	3
7	GO:0051969	regulation of transmission of nerve impulse	3
7	GO:0007268	synaptic transmission	3
7	GO:0031327	negative regulation of cellular biosynthetic process	3
7	GO:0045934	negative regulation of nucleobase-containing compound metabolic process	3
7	GO:0010629	negative regulation of gene expression	3
7	GO:0048608	reproductive structure development	3
7	GO:0007444	imaginal disc development	3
7	GO:0035114	imaginal disc-derived appendage morphogenesis	3
7	GO:0007051	spindle organization	2
7	GO:0051046	regulation of secretion	2
7	GO:0009953	dorsal/ventral pattern formation	2
7	GO:0097479	synaptic vesicle localization	2
7	GO:0035282	segmentation	2
7	GO:0016568	chromatin modification	2
7	GO:0034220	ion transmembrane transport	2
7	GO:0048565	digestive tract development	2
7	GO:0009968	negative regulation of signal transduction	2
7	GO:0044257	cellular protein catabolic process	2
7	GO:0043632	modification-dependent macromolecule catabolic process	2
7	GO:0032940	secretion by cell	2
7	GO:0051650	establishment of vesicle localization	2
7	GO:0006812	cation transport	2
7	GO:0019752	carboxylic acid metabolic process	1
7	GO:0060810	intracellular mRNA localization involved in pattern specification process	1
7	GO:0009267	cellular response to starvation	1
7	GO:0045168	cell-cell signaling involved in cell fate commitment	1
7	GO:0051223	regulation of protein transport	1
7	GO:0051780	behavioral response to nutrient	1
7	GO:0045475	locomotor rhythm	1
7	GO:0032386	regulation of intracellular transport	1
7	GO:0051588	regulation of neurotransmitter transport	1
7	GO:0031023	microtubule organizing center organization	1
7	GO:0048477	oogenesis	1
7	GO:0016055	Wnt receptor signaling pathway	1
7	GO:0009116	nucleoside metabolic process	1
7	GO:0060562	epithelial tube morphogenesis	1
7	GO:0033365	protein localization to organelle	1
7	GO:0072001	renal system development	1
7	GO:0048588	developmental cell growth	1
7	GO:0001700	embryonic development via the syncytial blastoderm	1
7	GO:0030866	cortical actin cytoskeleton organization	1
7	GO:0019220	regulation of phosphate metabolic process	1
7	GO:0007281	germ cell development	1
7	GO:0007423	sensory organ development	1
7	GO:0051952	regulation of amine transport	1
7	GO:0072358	cardiovascular system development	1
7	GO:0051169	nuclear transport	1
7	GO:0030100	regulation of endocytosis	1
7	GO:0045935	positive regulation of nucleobase-containing compound metabolic process	1
7	GO:0007283	spermatogenesis	1
7	GO:0010562	positive regulation of phosphorus metabolic process	1
7	GO:0030334	regulation of cell migration	1
7	GO:0030576	Cajal body organization	1
7	GO:0007277	pole cell development	1
7	GO:2001020	regulation of response to DNA damage stimulus	1
7	GO:0055090	acylglycerol homeostasis	1
7	GO:0051937	catecholamine transport	1
7	GO:0017038	protein import	1
7	GO:0043624	cellular protein complex disassembly	1
7	GO:0007611	learning or memory	1
7	GO:0032268	regulation of cellular protein metabolic process	1
7	GO:0044772	mitotic cell cycle phase transition	1
7	GO:0010628	positive regulation of gene expression	1
7	GO:0002168	instar larval development	1
7	GO:0048732	gland development	1
7	GO:0000281	mitotic cytokinesis	1
7	GO:0051293	establishment of spindle localization	1
7	GO:0009967	positive regulation of signal transduction	1
7	GO:0006412	translation	1
7	GO:0043269	regulation of ion transport	1
7	GO:0031349	positive regulation of defense response	1
7	GO:0051247	positive regulation of protein metabolic process	1
7	GO:0048534	hematopoietic or lymphoid organ development	1
7	GO:0006886	intracellular protein transport	1
7	GO:0007186	G-protein coupled receptor signaling pathway	1
7	GO:0006898	receptor-mediated endocytosis	1
7	GO:0044784	metaphase/anaphase transition of cell cycle	1
7	GO:0048469	cell maturation	1
7	GO:0050829	defense response to Gram-negative bacterium	1
7	GO:0007422	peripheral nervous system development	1
7	GO:0006259	DNA metabolic process	1
7	GO:0045088	regulation of innate immune response	1
7	GO:0019318	hexose metabolic process	1
7	GO:0010557	positive regulation of macromolecule biosynthetic process	1
7	GO:0045792	negative regulation of cell size	1
7	GO:0006909	phagocytosis	1
7	GO:0031328	positive regulation of cellular biosynthetic process	1
7	GO:0046364	monosaccharide biosynthetic process	1
7	GO:0007424	open tracheal system development	1
7	GO:0040029	regulation of gene expression, epigenetic	1
7	GO:0016482	cytoplasmic transport	1
7	GO:0042745	circadian sleep/wake cycle	1
7	GO:0046545	development of primary female sexual characteristics	1
8	GO:0032774	RNA biosynthetic process	5
8	GO:0051252	regulation of RNA metabolic process	5
8	GO:0015711	organic anion transport	4
8	GO:0048699	generation of neurons	4
8	GO:0050804	regulation of synaptic transmission	3
8	GO:0018193	peptidyl-amino acid modification	3
8	GO:0035220	wing disc development	3
8	GO:0008406	gonad development	3
8	GO:0006468	protein phosphorylation	3
8	GO:0048563	post-embryonic organ morphogenesis	3
8	GO:0007420	brain development	3
8	GO:0007265	Ras protein signal transduction	3
8	GO:2000113	negative regulation of cellular macromolecule biosynthetic process	3
8	GO:0097480	establishment of synaptic vesicle localization	2
8	GO:0007350	blastoderm segmentation	2
8	GO:0007052	mitotic spindle organization	2
8	GO:0009950	dorsal/ventral axis specification	2
8	GO:0061525	hindgut development	2
8	GO:0048546	digestive tract morphogenesis	2
8	GO:0051603	proteolysis involved in cellular protein catabolic process	2
8	GO:0051056	regulation of small GTPase mediated signal transduction	2
8	GO:0016569	covalent chromatin modification	2
8	GO:0006281	DNA repair	1
8	GO:0015698	inorganic anion transport	1
8	GO:0030001	metal ion transport	1
8	GO:0060070	canonical Wnt receptor signaling pathway	1
8	GO:0030703	eggshell formation	1
8	GO:0001944	vasculature development	1
8	GO:0043543	protein acylation	1
8	GO:0007637	proboscis extension reflex	1
8	GO:0051297	centrosome organization	1
8	GO:0006913	nucleocytoplasmic transport	1
8	GO:0051048	negative regulation of secretion	1
8	GO:0000070	mitotic sister chromatid segregation	1
8	GO:0034660	ncRNA metabolic process	1
8	GO:0042278	purine nucleoside metabolic process	1
8	GO:0007379	segment specification	1
8	GO:0032270	positive regulation of cellular protein metabolic process	1
8	GO:0006605	protein targeting	1
8	GO:0046394	carboxylic acid biosynthetic process	1
8	GO:0032388	positive regulation of intracellular transport	1
8	GO:0045814	negative regulation of gene expression, epigenetic	1
8	GO:0051222	positive regulation of protein transport	1
8	GO:0006520	cellular amino acid metabolic process	1
8	GO:0023061	signal release	1
8	GO:0040001	establishment of mitotic spindle localization	1
8	GO:0008258	head involution	1
8	GO:0060271	cilium morphogenesis	1
8	GO:0045089	positive regulation of innate immune response	1
8	GO:0034504	protein localization to nucleus	1
8	GO:0050432	catecholamine secretion	1
8	GO:0051294	establishment of spindle orientation	1
8	GO:0001505	regulation of neurotransmitter levels	1
8	GO:0031399	regulation of protein modification process	1
8	GO:0006006	glucose metabolic process	1
8	GO:0015672	monovalent inorganic cation transport	1
8	GO:0030097	hemopoiesis	1
8	GO:0022416	chaeta development	1
8	GO:0042325	regulation of phosphorylation	1
8	GO:0033109	cortical actin cytoskeleton stabilization	1
8	GO:0007279	pole cell formation	1
8	GO:0009994	oocyte differentiation	1
8	GO:0006396	RNA processing	1
8	GO:0030707	ovarian follicle cell development	1
8	GO:0019319	hexose biosynthetic process	1
8	GO:0070328	triglyceride homeostasis	1
8	GO:0009119	ribonucleoside metabolic process	1
8	GO:0016458	gene silencing	1
8	GO:0007612	learning	1
8	GO:0061326	renal tubule development	1
8	GO:0070647	protein modification by small protein conjugation or removal	1
8	GO:0033157	regulation of intracellular protein transport	1
8	GO:0022612	gland morphogenesis	1
8	GO:0015872	dopamine transport	1
8	GO:0046331	lateral inhibition	1
8	GO:0006887	exocytosis	1
8	GO:0006338	chromatin remodeling	1
8	GO:0006415	translational termination	1
8	GO:0045937	positive regulation of phosphate metabolic process	1
8	GO:0022410	circadian sleep/wake cycle process	1
8	GO:0072594	establishment of protein localization to organelle	1
8	GO:0007431	salivary gland development	1
8	GO:0007091	metaphase/anaphase transition of mitotic cell cycle	1
9	GO:2001141	regulation of RNA biosynthetic process	5
9	GO:0006351	transcription, DNA-dependent	5
9	GO:0030182	neuron differentiation	4
9	GO:0046942	carboxylic acid transport	3
9	GO:0007560	imaginal disc morphogenesis	3
9	GO:0051253	negative regulation of RNA metabolic process	3
9	GO:0019941	modification-dependent protein catabolic process	2
9	GO:0048489	synaptic vesicle transport	2
9	GO:0007442	hindgut morphogenesis	2
9	GO:0051058	negative regulation of small GTPase mediated signal transduction	2
9	GO:0046578	regulation of Ras protein signal transduction	2
9	GO:0016570	histone modification	2
9	GO:0072002	Malpighian tubule development	1
9	GO:0006821	chloride transport	1
9	GO:0042384	cilium assembly	1
9	GO:0042749	regulation of circadian sleep/wake cycle	1
9	GO:0008585	female gonad development	1
9	GO:0007304	chorion-containing eggshell formation	1
9	GO:0031123	RNA 3'-end processing	1
9	GO:0051057	positive regulation of small GTPase mediated signal transduction	1
9	GO:0018210	peptidyl-threonine modification	1
9	GO:0007440	foregut morphogenesis	1
9	GO:0018209	peptidyl-serine modification	1
9	GO:1901605	alpha-amino acid metabolic process	1
9	GO:0018205	peptidyl-lysine modification	1
9	GO:0090316	positive regulation of intracellular protein transport	1
9	GO:0051170	nuclear import	1
9	GO:0007266	Rho protein signal transduction	1
9	GO:0048599	oocyte development	1
9	GO:0051306	mitotic sister chromatid separation	1
9	GO:0008652	cellular amino acid biosynthetic process	1
9	GO:0034470	ncRNA processing	1
9	GO:0008306	associative learning	1
9	GO:0006575	cellular modified amino acid metabolic process	1
9	GO:0000132	establishment of mitotic spindle orientation	1
9	GO:0016073	snRNA metabolic process	1
9	GO:0051254	positive regulation of RNA metabolic process	1
9	GO:1900180	regulation of protein localization to nucleus	1
9	GO:0046128	purine ribonucleoside metabolic process	1
9	GO:0050802	circadian sleep/wake cycle, sleep	1
9	GO:0070646	protein modification by small protein removal	1
9	GO:0001932	regulation of protein phosphorylation	1
9	GO:0017157	regulation of exocytosis	1
9	GO:0006813	potassium ion transport	1
9	GO:0016319	mushroom body development	1
9	GO:0006473	protein acetylation	1
9	GO:0016601	Rac protein signal transduction	1
9	GO:0046822	regulation of nucleocytoplasmic transport	1
9	GO:0007435	salivary gland morphogenesis	1
9	GO:0035290	trunk segmentation	1
9	GO:0061333	renal tubule morphogenesis	1
9	GO:0031401	positive regulation of protein modification process	1
9	GO:0010498	proteasomal protein catabolic process	1
9	GO:0050433	regulation of catecholamine secretion	1
9	GO:0042327	positive regulation of phosphorylation	1
9	GO:0007269	neurotransmitter secretion	1
9	GO:0014046	dopamine secretion	1
9	GO:0044744	protein targeting to nucleus	1
9	GO:0048167	regulation of synaptic plasticity	1
9	GO:0007098	centrosome cycle	1
9	GO:0006094	gluconeogenesis	1
9	GO:0008407	chaeta morphogenesis	1
10	GO:0006355	regulation of transcription, DNA-dependent	5
10	GO:0048666	neuron development	4
10	GO:0007472	wing disc morphogenesis	3
10	GO:0006865	amino acid transport	3
10	GO:0046580	negative regulation of Ras protein signal transduction	2
10	GO:0006366	transcription from RNA polymerase II promoter	2
10	GO:0006511	ubiquitin-dependent protein catabolic process	2
10	GO:0046500	S-adenosylmethionine metabolic process	1
10	GO:0001934	positive regulation of protein phosphorylation	1
10	GO:0016579	protein deubiquitination	1
10	GO:0006475	internal protein amino acid acetylation	1
10	GO:0048488	synaptic vesicle endocytosis	1
10	GO:0045920	negative regulation of exocytosis	1
10	GO:0046928	regulation of neurotransmitter secretion	1
10	GO:0018394	peptidyl-lysine acetylation	1
10	GO:0018107	peptidyl-threonine phosphorylation	1
10	GO:0045187	regulation of circadian sleep/wake cycle, sleep	1
10	GO:0042398	cellular modified amino acid biosynthetic process	1
10	GO:0016180	snRNA processing	1
10	GO:0035023	regulation of Rho protein signal transduction	1
10	GO:0014059	regulation of dopamine secretion	1
10	GO:0051298	centrosome duplication	1
10	GO:0046579	positive regulation of Ras protein signal transduction	1
10	GO:1901052	sarcosine metabolic process	1
10	GO:0035292	specification of segmental identity, trunk	1
10	GO:0046824	positive regulation of nucleocytoplasmic transport	1
10	GO:0048168	regulation of neuronal synaptic plasticity	1
10	GO:0016079	synaptic vesicle exocytosis	1
10	GO:0018105	peptidyl-serine phosphorylation	1
10	GO:0007306	eggshell chorion assembly	1
10	GO:0007308	oocyte construction	1
10	GO:0006606	protein import into nucleus	1
10	GO:0048619	embryonic hindgut morphogenesis	1
10	GO:0035020	regulation of Rac protein signal transduction	1
10	GO:0043628	ncRNA 3'-end processing	1
10	GO:1901607	alpha-amino acid biosynthetic process	1
11	GO:0031175	neuron projection development	4
11	GO:0048667	cell morphogenesis involved in neuron differentiation	4
11	GO:0007476	imaginal disc-derived wing morphogenesis	3
11	GO:0045892	negative regulation of transcription, DNA-dependent	3
11	GO:0008038	neuron recognition	2
11	GO:0006357	regulation of transcription from RNA polymerase II promoter	2
11	GO:0003333	amino acid transmembrane transport	2
11	GO:0016578	histone deubiquitination	1
11	GO:1900242	regulation of synaptic vesicle endocytosis	1
11	GO:0033353	S-adenosylmethionine cycle	1
11	GO:0045938	positive regulation of circadian sleep/wake cycle, sleep	1
11	GO:0034472	snRNA 3'-end processing	1
11	GO:0046843	dorsal appendage formation	1
11	GO:2000300	regulation of synaptic vesicle exocytosis	1
11	GO:0048172	regulation of short-term neuronal synaptic plasticity	1
11	GO:0018393	internal peptidyl-lysine acetylation	1
11	GO:0007309	oocyte axis specification	1
11	GO:0007385	specification of segmental identity, abdomen	1
11	GO:0035520	monoubiquitinated protein deubiquitination	1
11	GO:0042306	regulation of protein import into nucleus	1
11	GO:0043161	proteasomal ubiquitin-dependent protein catabolic process	1
11	GO:1901054	sarcosine biosynthetic process	1
11	GO:0042991	transcription factor import into nucleus	1
11	GO:0035021	negative regulation of Rac protein signal transduction	1
11	GO:0007443	Malpighian tubule morphogenesis	1
11	GO:0045893	positive regulation of transcription, DNA-dependent	1
11	GO:0010799	regulation of peptidyl-threonine phosphorylation	1
11	GO:0015804	neutral amino acid transport	1
11	GO:0015807	L-amino acid transport	1
11	GO:0035025	positive regulation of Rho protein signal transduction	1
12	GO:0061564	axon development	4
12	GO:0048812	neuron projection morphogenesis	4
12	GO:0008039	synaptic target recognition	2
12	GO:0042990	regulation of transcription factor import into nucleus	1
12	GO:0008587	imaginal disc-derived wing margin morphogenesis	1
12	GO:0035521	monoubiquitinated histone deubiquitination	1
12	GO:0051531	NFAT protein import into nucleus	1
12	GO:0016573	histone acetylation	1
12	GO:0007310	oocyte dorsal/ventral axis specification	1
12	GO:0045944	positive regulation of transcription from RNA polymerase II promoter	1
12	GO:0010800	positive regulation of peptidyl-threonine phosphorylation	1
12	GO:2000301	negative regulation of synaptic vesicle exocytosis	1
12	GO:0000122	negative regulation of transcription from RNA polymerase II promoter	1
12	GO:0016358	dendrite development	1
12	GO:0031146	SCF-dependent proteasomal ubiquitin-dependent protein catabolic process	1
12	GO:0015816	glycine transport	1
12	GO:0042307	positive regulation of protein import into nucleus	1
12	GO:0006342	chromatin silencing	1
13	GO:0097485	neuron projection guidance	4
13	GO:0007409	axonogenesis	4
13	GO:0016201	synaptic target inhibition	2
13	GO:0035522	monoubiquitinated histone H2A deubiquitination	1
13	GO:0043967	histone H4 acetylation	1
13	GO:0042993	positive regulation of transcription factor import into nucleus	1
13	GO:0051663	oocyte nucleus localization involved in oocyte dorsal/ventral axis specification	1
13	GO:1990138	neuron projection extension	1
13	GO:0051532	regulation of NFAT protein import into nucleus	1
13	GO:0048813	dendrite morphogenesis	1
13	GO:0043968	histone H2A acetylation	1
14	GO:0007411	axon guidance	4
14	GO:0051533	positive regulation of NFAT protein import into nucleus	1
14	GO:0070983	dendrite guidance	1
14	GO:0048675	axon extension	1
15	GO:0008045	motor neuron axon guidance	3
15	GO:0071678	olfactory bulb axon guidance	1
15	GO:0031290	retinal ganglion cell axon guidance	1
