# Supplementary material for: Preparing for Winter: The Transcriptomic Response Associated with Different Day Lengths in Drosophila montana
Source: G3 (Bethesda). 2016 Mar 11;6(5):1373–81. doi: 10.1534/g3.116.027870 (PMC4856088; doi:10.1534/g3.116.027870)
Supplement: Supplemental Material [file supp_g3.116.027870_TableS3.xlsx]

## Sheet: Sheet1
Table S3 | neurogenesis / neuron development associated genes DE in response to a shorter day length in either diapausing or non-diapausing females.
(Seq. Name = sequence name, Reproductive state = If the DE gene was identified in diapausing or non-diapausing females, FDR = false discovery rate)
Seq. Name	D. melanogaster orthologs	Process	reproductive state	Log2 fold change (Diapausing)	FDR (Diapausing)	Log2 fold change (non-diapausing)	FDR (Non-diapausing)	FDR interaction
contig_29299	CG8564	neurogenesis, proteolysis	both	1.31027	0.0195597	-1.4476	0.00827149	7.64e-06
contig_13601	sas	instar larval development, axon guidance	Diapausing only	6.95893	0.00394798	-0.395265	0.999866	0.0106699
contig_13779	smooth	adult feeding behavior, axon guidance, determination of adult lifespan	Diapausing only	-5.44367	0.0377428	3.63835	0.501957	0.00187702
contig_15673	RhoGAP100F	maintenance of presynaptic active zone structure, cytoskeletal matrix organization at active zone, R7 cell development, axon extension involved in axon guidance, Rho protein signal transduction	Diapausing only	-1.35977	0.0267545	-0.346153	0.999866	0.535468
contig_16808	Liprin-alpha	photoreceptor cell morphogenesis, anterograde synaptic vesicle transport, axon target recognition, retinal ganglion cell axon guidance, regulation of axon extension involved in axon guidance, synaptic growth at neuromuscular junction	Diapausing only	-5.05397	0.00872021	0.666923	0.999866	0.0200343
contig_21960	ko	motor neuron axon guidance	Diapausing only	-4.34572	0.0122738	-0.0716767	0.999866	0.0964453
contig_22364	CG9098	neuron projection morphogenesis, positive regulation of Ras protein signal transduction	Diapausing only	6.26932	0.00649802	0.0321655	0.999866	0.0356673
contig_23305	mbl	rhabdomere development, muscle cell cellular homeostasis, embryo development, muscle organ development, peripheral nervous system development, somatic muscle development, regulation of female receptivity, apoptotic process	Diapausing only	-4.71666	0.00985502	-0.899131	0.999866	0.201178
contig_24569	wit	protein phosphorylation, neuromuscular synaptic transmission, dendrite morphogenesis, lateral inhibition, positive regulation of synaptic growth at neuromuscular junction, transmembrane receptor protein serine/threonine kinase signaling pathway	Diapausing only	4.17406	0.00991303	-0.0304602	0.999866	0.0718494
contig_25159	salr	antennal joint development, imaginal disc-derived wing vein morphogenesis, sensory perception of sound, male genitalia development, male gonad development, sensory organ development, regulation of transcription, DNA-dependent, neurogenesis	Diapausing only	1.36139	0.00872021	-0.139655	0.999866	0.0822616
contig_26556	MED28	regulation of transcription from RNA polymerase II promoter, neurogenesis	Diapausing only	1.6802	0.00029567	-0.772151	0.595465	2.79e-05
contig_29299	CG8564	neurogenesis, proteolysis	Diapausing only	1.31027	0.0195597	-1.4476	0.00827149	7.64e-06
contig_4401	spen	axon guidance, neuroblast fate determination, glial cell fate determination, glial cell migration, establishment of thoracic bristle planar orientation, imaginal disc-derived wing vein morphogenesis, peripheral nervous system development	Diapausing only	2.87319	0.0282682	0.362779	0.999866	0.29083
contig_633	Yp3	sex differentiation, vitellogenesis, embryo development, neurogenesis, lipid metabolic process	Diapausing only	-1.5625	0.0113036	0.158459	0.999866	0.0650152
contig_8009	Yp2	sex differentiation, vitellogenesis, oogenesis, neurogenesis, lipid metabolic process	Diapausing only	-1.50395	0.0112692	0.335158	0.999866	0.0241106
contig_9106	Abl	negative regulation of synaptic growth at neuromuscular junction, epithelial cell morphogenesis, motor neuron axon guidance, neuron migration, axon midline choice point recognition, ventral cord development	Diapausing only	-2.48283	0.0296138	1.41978	0.805855	0.00367278
contig_15786	Dichaete	brain development, hindgut morphogenesis, negative regulation of transcription from RNA polymerase II promoter, positive regulation of transcription from RNA polymerase II promoter, dendrite guidance, axon guidance	Non-Diapausing only	0.19624	0.996561	-6.0485	0.00617805	0.0232295
contig_2007	fz2	axon extension, salivary gland morphogenesis, synapse organization, imaginal disc-derived wing margin morphogenesis, synaptic target inhibition, motor neuron axon guidance	Non-Diapausing only	0.0830621	0.996561	1.80663	0.015373	0.153533
contig_25677	mxc	lateral inhibition, hemocyte differentiation, hemocyte proliferation, hemopoiesis, neurogenesis	Non-Diapausing only	0.28129	0.991718	-2.95127	0.0453928	0.120602
contig_29299	CG8564	neurogenesis, proteolysis	Non-Diapausing only	1.31027	0.0195597	-1.4476	0.00827149	7.64e-06
contig_653	Lsp2	synaptic target inhibition, motor neuron axon guidance	Non-Diapausing only	0.297955	0.989156	2.60432	0.0453928	0.280707
contig_7028	plexB	motor neuron axon guidance, negative regulation of Rac protein signal transduction, positive regulation of Rho protein signal transduction, olfactory bulb axon guidance	Non-Diapausing only	0.215722	0.996561	5.68935	0.00602896	0.0412547
