# Supplementary material for: Preparing for Winter: The Transcriptomic Response Associated with Different Day Lengths in Drosophila montana
Source: G3 (Bethesda). 2016 Mar 11;6(5):1373–81. doi: 10.1534/g3.116.027870 (PMC4856088; doi:10.1534/g3.116.027870)
Supplement: Supplemental Material [file supp_g3.116.027870_TableS4.xlsx]

## Sheet: ion_trans_active_out
Table S4 | ion transport associated genes DE in response to a shorter day length in either diapausing or non-diapausing females.
(Seq. Name = sequence name, Reproductive state = If the DE gene was identified in diapausing or non-diapausing females, FDR = false discovery rate)
Seq. Name	D. melanogaster orthologs	Process	reproductive state	Log2 fold change (Diapausing)	FDR (Diapausing)	Log2 fold change (non-diapausing)	FDR (Non-diapausing)	FDR interaction
contig_10780	Rh50	ammonium transport	Diapausing only	1.01411	0.031471	-0.608442	0.975864	0.0180347
contig_30325	Ctr1C	copper ion transmembrane transport	Diapausing only	1.48943	0.0300682	-0.3321	0.999866	0.0647046
contig_5578	para	transmembrane transport, response to DDT, response to pyrethroid, sodium ion transport, male courtship behavior	Diapausing only	-3.42026	0.0403173	-0.415097	0.999866	0.330539
contig_8801	CG14741	phospholipid transport, cation transport	Diapausing only	1.24068	0.0308051	-1.08163	0.219328	0.000540955
contig_14593	Oatp33Eb	organic anion transport	Non-Diapausing only	0.347611	0.993381	5.18982	0.00700745	0.0707389
contig_15352	CG32079	amino acid transmembrane transport	Non-Diapausing only	0.892726	0.613781	-1.89353	0.00700745	0.0013665
contig_22605	CG5549	neurotransmitter transport, glycine transport	Non-Diapausing only	-0.351067	0.991366	-4.1539	0.0245571	0.178498
contig_23862	CG13384	amino acid transmembrane transport	Non-Diapausing only	0.202087	0.996561	4.36272	0.015733	0.117529
contig_27300	Ih	transmembrane transport, potassium ion transport, proboscis extension reflex, determination of adult lifespan, regulation of dopamine secretion, locomotor rhythm,	Non-Diapausing only	-0.00803692	0.999111	-5.67984	0.00730717	0.0471096
contig_5970	Best1	chloride transport, cell volume homeostasis	Non-Diapausing only	0.0363162	0.99806	4.56227	0.00700745	0.0554517
