# Supplementary material for: Preparing for Winter: The Transcriptomic Response Associated with Different Day Lengths in Drosophila montana
Source: G3 (Bethesda). 2016 Mar 11;6(5):1373–81. doi: 10.1534/g3.116.027870 (PMC4856088; doi:10.1534/g3.116.027870)
Supplement: Supplemental Material [file supp_g3.116.027870_TableS5.xlsx]

## Sheet: sheet1
Table S5 | reproduction associated genes DE in response to a shorter day length in either diapausing or non-diapausing females.
(Seq. Name = sequence name, Reproductive state = If the DE gene was identified in diapausing or non-diapausing females, FDR = false discovery rate)
Seq. Name	D. melanogaster orthologs	Process	reproductive state	Log2 fold change (Diapausing)	FDR (Diapausing)	Log2 fold change (non-diapausing)	FDR (Non-diapausing)	FDR interaction
contig_9106	Abl	ventral furrow formation, nurse cell to oocyte, ventral cord development, compound eye development, photoreceptor cell axon guidance, positive regulation of protein export from nucleus	Diapausing only	-2.48283	0.0296138	1.41978	0.805855	0.00367278
contig_491	CG12316	male courtship behavior, veined wing generated song production, histone H4-K16 acetylation	Diapausing only	-5.48262	0.0443938	4.05432	0.403731	0.0013665
contig_19630	dpp	zygotic determination of anterior/posterior axis, embryo, genital disc sexually dimorphic development, ectodermal cell fate specification, progression of morphogenetic furrow involved in compound eye morphogenesis, maternal specification of dorsal/ventral axis, oocyte	Diapausing only	-3.36345	0.0169442	2.83654	0.128469	0.000112337
contig_12109	Gprk2	positive regulation of cAMP-mediated signaling, apical constriction involved in gastrulation, oocyte morphogenesis	Diapausing only	-0.956108	0.0122738	0.481967	0.818068	0.00189157
contig_3252	ifc	spermatogenesis, spindle assembly involved in male meiosis, sphingolipid biosynthetic process	Diapausing only	3.64645	0.0267545	-0.0389525	0.999866	0.139235
contig_23305	mbl	rhabdomere development, muscle cell cellular homeostasis, embryo development, muscle organ development, peripheral nervous system development, regulation of female receptivity, apoptotic process	Diapausing only	-4.71666	0.00985502	-0.899131	0.999866	0.201178
contig_14279	Mdr49	drug transmembrane transport, germ cell migration, response to hypoxia, response to methotrexate	Diapausing only	-1.05259	0.025728	0.538873	0.999866	0.0200343
contig_5578	para	transmembrane transport, response to DDT, response to pyrethroid, sodium ion transport, male courtship behavior, veined wing generated song production, response to hypoxia, mechanosensory behavior, synaptic transmission, response to drug	Diapausing only	-3.42026	0.0403173	-0.415097	0.999866	0.330539
contig_16482	Pex12	protein targeting to peroxisome, spermatid development, spermatocyte division	Diapausing only	3.64361	0.0169442	-0.266654	0.999866	0.0779354
contig_25159	salr	antennal joint development, imaginal disc-derived wing vein morphogenesis, sensory perception of sound, male genitalia development, male gonad development, sensory organ development, regulation of transcription, DNA-dependent, neurogenesis	Diapausing only	1.36139	0.00872021	-0.139655	0.999866	0.0822616
contig_5844	toucan	syncytial blastoderm mitotic cell cycle, ovarian follicle cell development, mitotic sister chromatid segregation, mitotic spindle organization, imaginal disc-derived wing morphogenesis	Diapausing only	3.98291	0.0153065	0.11366	0.999866	0.122916
contig_19416	wash	spiracle morphogenesis, open tracheal system, prepupal development, Arp2/3 complex-mediated actin nucleation, oogenesis, microtubule bundle formation, actin filament bundle assembly, actin crosslink formation, retrograde transport, endosome to Golgi	Diapausing only	-1.73058	0.0176609	0.0667578	0.999866	0.0585376
contig_14939	wek	Toll signaling pathway, maternal specification of dorsal/ventral axis, oocyte, germ-line encoded, regulation of transcription, DNA-dependent	Diapausing only	-1.65431	0.0237195	-0.125067	0.999866	0.161882
contig_8009	Yp2	sex differentiation, vitellogenesis, oogenesis, neurogenesis, lipid metabolic process	Diapausing only	-1.50395	0.0112692	0.335158	0.999866	0.0241106
contig_633	Yp3	sex differentiation, vitellogenesis, embryo development, neurogenesis, lipid metabolic process	Diapausing only	-1.5625	0.0113036	0.158459	0.999866	0.0650152
contig_16124	MCPH1	mushroom body development, mitosis, embryo development, pole cell formation	Non-Diapausing only	-0.0883344	0.99806	4.19601	0.0398686	0.120602
contig_19929	thr	positive regulation of NFAT protein import into nucleus, centrosome duplication, mitotic sister chromatid separation, cytokinesis, gonad development, digestive tract mesoderm development	Non-Diapausing only	0.700612	0.229241	-0.891635	0.0308958	0.000776042
contig_2007	fz2	female gonad development, development	Non-Diapausing only	0.0830621	0.996561	1.80663	0.015373	0.153533
contig_27667	asun	spermatogenesis, snRNA 3'-end processing, dorsal appendage formation, oocyte nucleus localization involved in oocyte dorsal/ventral axis specification, centrosome localization, regulation of mitotic cell cycle	Non-Diapausing only	0.436171	0.991366	-6.34422	0.00617805	0.0172906
contig_5950	wb	gonad development, digestive tract mesoderm development, regulation of cell migration, regulation of cell adhesion, regulation of embryonic development, imaginal disc-derived wing morphogenesis	Non-Diapausing only	-0.063352	0.99806	3.90571	0.0245571	0.110029
