# Supplementary material for: Preparing for Winter: The Transcriptomic Response Associated with Different Day Lengths in Drosophila montana
Source: G3 (Bethesda). 2016 Mar 11;6(5):1373–81. doi: 10.1534/g3.116.027870 (PMC4856088; doi:10.1534/g3.116.027870)
Supplement: Supplemental Material [file supp_g3.116.027870_TableS6.xlsx]

## Sheet: Primary_meta_active_out
Table S6 | metabolic associated genes DE in response to a shorter day length in either diapausing or non-diapausing females.
(Seq. Name = sequence name, Reproductive state = If the DE gene was identified in diapausing or non-diapausing females, FDR = false discovery rate)
Seq. Name	D. melanogaster orthologs	Process	reproductive state	Log2 fold change (Diapausing)	FDR (Diapausing)	Log2 fold change (non-diapausing)	FDR (Non-diapausing)	FDR interaction
contig_29299	CG8564	neurogenesis, proteolysis	Both	1.31027	0.0195597	-1.4476	0.00827149	7.64e-06
contig_29596	CG10177	protein phosphorylation, Golgi organization, negative regulation of cell size, intracellular signal transduction	Both	1.96677	7.13e-05	-1.71991	0.00345314	3.42e-10
contig_11256	CG2543	tetrahydrofolylpolyglutamate biosynthetic process	Diapausing only	-1.03049	0.0153065	0.171393	0.999866	0.0554517
contig_12109	Gprk2	protein phosphorylation, regulation of antimicrobial peptide biosynthetic process, negative regulation of smoothened signaling pathway, positive regulation of cAMP-mediated signaling	Diapausing only	-0.956108	0.0122738	0.481967	0.818068	0.00189157
contig_12121	CG1347	activation of protein kinase activity, salivary gland cell autophagic cell death, larval midgut cell programmed cell death	Diapausing only	-2.47694	0.0153065	-0.178695	0.999866	0.204091
contig_13685	CG31326	proteolysis	Diapausing only	4.34568	0.0153065	0.100991	0.999866	0.116499
contig_14939	wek	Toll signaling pathway, maternal specification of dorsal/ventral axis, oocyte, germ-line encoded, regulation of transcription, DNA-dependent	Diapausing only	-1.65431	0.0237195	-0.125067	0.999866	0.161882
contig_19193	CG16904	fatty acid elongation	Diapausing only	2.02844	6.95e-07	0.0224896	0.999866	0.00662134
contig_19630	dpp	negative regulation of gene expression	Diapausing only	-3.36345	0.0169442	2.83654	0.128469	0.000112337
contig_20642	Sym	mRNA cleavage, histone mRNA 3'-end processing, mRNA polyadenylation	Diapausing only	-1.45047	0.0123473	0.474314	0.999866	0.0100285
contig_21424	CG14937	SCF-dependent proteasomal ubiquitin-dependent protein catabolic process	Diapausing only	3.52829	0.0153065	-0.124845	0.999866	0.0934152
contig_23305	mbl	regulation of female receptivity, apoptotic process, regulation of alternative mRNA splicing, via spliceosome, imaginal disc-derived wing morphogenesis	Diapausing only	-4.71666	0.00985502	-0.899131	0.999866	0.201178
contig_24249	Probable E3 ubiquitin-protein ligase HERC2	protein ubiquitination involved in ubiquitin-dependent protein catabolic process	Diapausing only	-1.17071	0.0267545	0.150444	0.999866	0.122916
contig_24569	wit	protein phosphorylation, neuromuscular synaptic transmission, dendrite morphogenesis, lateral inhibition, positive regulation of synaptic growth at neuromuscular junction, transmembrane receptor protein serine/threonine kinase signaling pathway	Diapausing only	4.17406	0.00991303	-0.0304602	0.999866	0.0718494
contig_25159	salr	antennal joint development, imaginal disc-derived wing vein morphogenesis, sensory perception of sound, male genitalia development, male gonad development, sensory organ development, regulation of transcription, DNA-dependent, neurogenesis	Diapausing only	1.36139	0.00872021	-0.139655	0.999866	0.0822616
contig_25503	CG6767	ribonucleoside monophosphate biosynthetic process, imaginal disc-derived wing morphogenesis, nucleotide biosynthetic process	Diapausing only	-4.50578	0.00872021	-0.586779	0.999866	0.153719
contig_25808	CG1632	proteolysis	Diapausing only	4.70141	0.00987401	0.0589831	0.999866	0.0896969
contig_26216	zfh2	imaginal disc-derived wing morphogenesis, central nervous system development, regulation of transcription, DNA-dependent	Diapausing only	-6.25474	0.00428572	-0.411185	0.999866	0.0492635
contig_26556	MED28	regulation of transcription from RNA polymerase II promoter, neurogenesis	Diapausing only	1.6802	0.00029567	-0.772151	0.595465	2.79e-05
contig_2684	CG9238	behavioral response to ethanol, regulation of glycogen metabolic process	Diapausing only	-1.26127	0.0122738	-0.0722073	0.999866	0.178912
contig_27981	MED16	transcription initiation from RNA polymerase II promoter	Diapausing only	-2.32409	0.0293185	0.0718124	0.999866	0.107287
contig_28028	CG33260	tRNA-type intron splice site recognition and cleavage	Diapausing only	-3.76884	0.0142383	-0.601916	0.999866	0.257694
contig_29299	CG8564	neurogenesis, proteolysis	Diapausing only	1.31027	0.0195597	-1.4476	0.00827149	7.64e-06
contig_29596	CG10177	protein phosphorylation, Golgi organization, negative regulation of cell size, intracellular signal transduction	Diapausing only	1.96677	7.13e-05	-1.71991	0.00345314	3.42e-10
contig_3252	ifc	spermatogenesis, spindle assembly involved in male meiosis, sphingolipid biosynthetic process	Diapausing only	3.64645	0.0267545	-0.0389525	0.999866	0.139235
contig_4401	spen	regulation of transcription, DNA-dependent, defense response to fungus, positive regulation of Wnt receptor signaling pathway, compound eye development, wing disc pattern formation	Diapausing only	2.87319	0.0282682	0.362779	0.999866	0.29083
contig_491	CG12316	male courtship behavior, veined wing generated song production, histone H4-K16 acetylation	Diapausing only	-5.48262	0.0443938	4.05432	0.403731	0.0013665
contig_633	Yp3	sex differentiation, vitellogenesis, embryo development, neurogenesis, lipid metabolic process	Diapausing only	-1.5625	0.0113036	0.158459	0.999866	0.0650152
contig_6502	Acetyl-CoA carboxylase	cell morphogenesis, fatty acid biosynthetic process	Diapausing only	1.21966	0.0335345	-0.867798	0.61834	0.00274515
contig_7281	NT5E-2	nucleotide catabolic process	Diapausing only	1.20666	0.0122738	-0.358091	0.999866	0.0226071
contig_8009	Yp2	sex differentiation, vitellogenesis, oogenesis, neurogenesis, lipid metabolic process	Diapausing only	-1.50395	0.0112692	0.335158	0.999866	0.0241106
contig_8119	YL-1	histone acetylation, histone exchange, negative regulation of gene expression, regulation of transcription, DNA-dependent	Diapausing only	1.28626	0.0374548	-1.05833	0.297714	0.000829508
contig_9106	Abl	positive regulation of protein export from nucleus	Diapausing only	-2.48283	0.0296138	1.41978	0.805855	0.00367278
contig_11196	DMAP1	negative regulation of transcription, DNA-dependent, phagocytosis, histone H2A acetylation, histone H4 acetylation, DNA repair, chromatin remodeling	Non-Diapausing only	0.408338	0.987331	-3.89043	0.0135098	0.0462375
contig_1338	Pepck	gluconeogenesis	Non-Diapausing only	-0.995387	0.169891	1.46614	0.00602896	6.52e-05
contig_15201	NFAT	regulation of transcription, DNA-dependent, regulation of response to DNA damage stimulus	Non-Diapausing only	0.0270853	0.99806	-4.15852	0.0201646	0.0957467
contig_15786	Dichaete	negative regulation of transcription from RNA polymerase II promoter, positive regulation of transcription from RNA polymerase II promoter	Non-Diapausing only	0.19624	0.996561	-6.0485	0.00617805	0.0232295
contig_16615	CG6188	sarcosine biosynthetic process, S-adenosylmethionine cycle, triglyceride homeostasis	Non-Diapausing only	0.320631	0.948972	1.71923	0.012652	0.234703
contig_19701	Lrrk	peptidyl-serine phosphorylation	Non-Diapausing only	-0.109021	0.99806	-8.17047	0.00360715	0.0104273
contig_2007	fz2	regulation of transcription from RNA polymerase II promoter	Non-Diapausing only	0.0830621	0.996561	1.80663	0.015373	0.153533
contig_20526	CG31633	SCF-dependent proteasomal ubiquitin-dependent protein catabolic process	Non-Diapausing only	0.487448	0.990369	6.02088	0.00617805	0.0634581
contig_2239	CG7542	proteolysis	Non-Diapausing only	-0.542433	0.977816	-3.98397	0.0220993	0.212082
contig_23003	CG13283	proteolysis	Non-Diapausing only	-0.511343	0.963792	3.27992	0.00396409	0.0100285
contig_27090	slik	positive regulation of peptidyl-threonine phosphorylation	Non-Diapausing only	0.174302	0.990684	-1.82151	0.0276674	0.106074
contig_27667	asun	snRNA 3'-end processing	Non-Diapausing only	0.436171	0.991366	-6.34422	0.00617805	0.0172906
contig_28683	HBS1	translational termination	Non-Diapausing only	-0.0600513	0.99806	6.18288	0.00396409	0.0179008
contig_29299	CG8564	proteolysis	Non-Diapausing only	1.31027	0.0195597	-1.4476	0.00827149	7.64e-06
contig_29596	CG10177	protein phosphorylation	Non-Diapausing only	1.96677	7.13e-05	-1.71991	0.00345314	3.42e-10
contig_30180	CG4927	proteolysis	Non-Diapausing only	-0.237858	0.996561	-5.59702	0.00396409	0.039326
contig_8221	calypso	monoubiquitinated histone H2A deubiquitination, ubiquitin-dependent protein catabolic process, chromatin silencing	Non-Diapausing only	-0.161575	0.994317	-1.12549	0.0162213	0.634342

## Sheet: Sheet1
a
contig_11196
contig_11256
contig_12109
contig_12121
contig_1338
contig_13685
contig_14939
contig_15201
contig_15786
contig_16615
contig_19193
contig_19630
contig_19701
contig_2007
contig_20526
contig_20642
contig_21424
contig_2239
contig_23003
contig_23305
contig_24249
contig_24569
contig_25159
contig_25503
contig_25808
contig_26216
contig_26556
contig_2684
contig_27090
contig_27667
contig_27981
contig_28028
contig_28683
contig_30180
contig_3252
contig_4401
contig_491
contig_633
contig_6502
contig_7281
contig_8009
contig_8119
contig_8221
contig_9106
